# Supplementary material for: A chemically induced, room temperature, single source precursor to CuS (covellite) nanomaterials: synthesis and reactivity of [Cu(S2CNHBz)]n
Source: Royal Society of Chemistry journal article supplement (doi:10.1039/d4dt02366h), 2024-01-01

# A chemically-induced, room temperature, single source precursor to CuS (covellite) nanomaterials: Synthesis and reactivity of $[\text{Cu}(\text{S}_2\text{CNHBz})]_n$

Siqiao Huang<sup>a</sup>, Xiang Xu<sup>a,b</sup>, Jagodish Sarker<sup>a</sup>, David Pugh<sup>a</sup> and Graeme Hogarth<sup>a</sup>

## Electronic supplementary information

### Experimental section

Synthesis of  $[\text{Cu}(\text{S}_2\text{CNHBz})]_n$  (**1**)

Synthesis of  $[\text{Cu}(\kappa^2\text{-S}_2\text{CNHBz})(\text{PPh}_3)_2]$  (**2**)

Synthesis of  $[\text{Cu}(\kappa^2\text{-S}_2\text{CNHBz})(\kappa^2\text{-dppf})]$  (**3**)

Decomposition studies

X-ray crystallography

**Table S1.** Crystallographic data and structure refinement

Molecular structure of **2**

Molecular structure of **3**

Molecular structure of  $(\text{BzNH})_2\text{C}=\text{S}$

**Figure S1**  $^1\text{H}$  NMR spectrum of **1**

**Figure S2**  $^{13}\text{C}\{^1\text{H}\}$  NMR spectrum of **1**

**Figure S3**  $^1\text{H}$  NMR spectrum of  $(\text{BzNH})_2\text{C}=\text{S}$

**Figure S4**  $^{13}\text{C}\{^1\text{H}\}$  NMR spectrum of  $(\text{BzNH})_2\text{C}=\text{S}$

**Figure S5**  $^1\text{H}$  NMR spectrum of **2**

**Figure S6**  $^{13}\text{C}\{^1\text{H}\}$  NMR spectrum of **2**

**Figure S7**  $^{31}\text{P}\{^1\text{H}\}$  NMR spectrum of **2**

**Figure S8**  $^1\text{H}$  NMR spectrum of **3**

**Figure S9**  $^{13}\text{C}\{^1\text{H}\}$  NMR spectrum of **3**

**Figure S10**  $^{31}\text{P}\{^1\text{H}\}$  NMR spectrum of **3**

**Figure S11** IR spectrum of **1**

## Experimental section

All reactions were carried out in air using standard lab reagents.

### Synthesis of $[\text{Cu}(\text{S}_2\text{CNHBz})]_n$ (**1**)

NaOH (0.97 g, 24 mmol) and BzNH<sub>2</sub> (2.57 g, 24 mmol) were dissolved in water (100 ml). To this CS<sub>2</sub> (1.82 g, 24 mmol) was added dropwise with rapid stirring. After ca. 30 min a clear pale-yellow solution resulted. To this was added dropwise with rigorous stirring a solution of CuSO<sub>4</sub>·5H<sub>2</sub>O (2.99 g, 12 mmol) in water (40 ml). A heavy yellow precipitate formed. After complete addition the suspension was stirred for ca. 1 h and then the yellow solid was collected by vacuum filtration, washed with water (ca. 4 x 50 ml), MeOH (ca. 3 x 50 ml), thf (ca. 2 x 40 ml) and dried at ca. 60 °C to give a light yellow solid (**1** 2.30 g, 78 %). Slow evaporation of the methanol washing afforded colourless crystals of the (BzNH)<sub>2</sub>C=S as characterised crystallographically (see ESI) and NMR. Characterising data: **1**: Anal. Calc. for CuS<sub>2</sub>NC<sub>8</sub>H<sub>8</sub>: C, 39.10; H, 3.26; N, 5.70. Found: C, 38.76; H, 3.45; N, 5.53. IR (cm<sup>-1</sup>) 3221 (N-H), 1494 (C-N), 1454, 1428, 1380, 1338, 1305, 1248 (C-S), 1205, 1083, 1041, 1026, 969, 915, 897, 821, 742, 694, 613, 551, 538, 515, 445. <sup>1</sup>H NMR (DMSO-d<sub>6</sub>): δ 4.73 (d, J 4 Hz, 2H, CH<sub>2</sub>), 7.27-7.45 (m, 5H, Ph), 10.90 (t, J 4 Hz, 1H, NH). <sup>13</sup>C{<sup>1</sup>H} NMR (DMSO-d<sub>6</sub>): δ 204.3, 136.7, 128.9, 128.4, 128.2, 127.7, 127.3, 127.2, 51.8. μ<sub>eff</sub>: 0 BM. (BzNH)<sub>2</sub>C=S: <sup>1</sup>H NMR (d<sup>6</sup>-dmsO) δ 7.98 (brs, 2H, NH), 7.35-7.32 (m, 10H, Ph), 4.71 (brs, 4H, CH<sub>2</sub>). <sup>13</sup>C{<sup>1</sup>H} (d<sup>6</sup>-dmsO) 183.0, 139.3, 128.3, 127.8, 126.9, 47.1.

### Synthesis of $[\text{Cu}(\kappa^2\text{-S}_2\text{CNHBz})(\text{PPh}_3)_2]$ (**2**)

To a mixture of **1** (50 mg, 0.24 mmol) and PPh<sub>3</sub> (130 mg, 0.50 mmol) in a large sample vial was added ca. 10 ml of CH<sub>2</sub>Cl<sub>2</sub>. The solution was manually shaken for ca. 10 min during which time insoluble **1** slowly dispersed to afford a colourless solution. This was filtered under gravity and the filtrate was layered with hexanes. Slow mixing of the solvents, and later slow evaporation of the solvents, led to the deposition of white crystals of **2** (75 mg, 82%). Crystals of **2** suitable for X-ray crystallography were grown by the slow diffusion of hexanes into a concentrated CH<sub>2</sub>Cl<sub>2</sub> solution. We also prepared **2** from the reaction of [Cu(NO<sub>3</sub>)(PPh<sub>3</sub>)] and NaS<sub>2</sub>CNHBz. [Cu(NO<sub>3</sub>)(PPh<sub>3</sub>)<sub>2</sub>] (0.13 g, 0.20 mmol) was dissolved in CH<sub>2</sub>Cl<sub>2</sub> (20 mL) and to this was added NaS<sub>2</sub>CNH<sup>i</sup>Bz·3H<sub>2</sub>O (44.8 mg 0.20 mmol). The pale-yellow solution was stirred at room temperature for ca. 1 h, becoming slightly darker. A small amount of acid was added

(to remove any PPh<sub>3</sub>) and the solution was washed with water (5 mL) and dried over MgSO<sub>4</sub>. After filtration and removal of volatiles under reduced pressure, **2** was isolated (0.11 g, 73%).

Characterising data: **2**: Anal. Calc. for CuS<sub>2</sub>NP<sub>2</sub>C<sub>44</sub>H<sub>38</sub>.CH<sub>2</sub>Cl<sub>2</sub>: C, 64.25; H, 4.76; N, 1.67. Found: C, 64.43; H, 4.85; N, 1.73. <sup>1</sup>H NMR (CDCl<sub>3</sub>) δ 4.75 (d, J 8.0 Hz, 2H, CH<sub>2</sub>), 7.26-7.47 (m, 35H, Ph), 7.66 (brs, 1H, NH). <sup>13</sup>C{<sup>1</sup>H} NMR (CDCl<sub>3</sub>) δ 211.0, 137.5, 134.5, 134.3, 133.9, 133.8, 129.3, 129.1, 128.6, 128.4, 128.3, 128.0, 127.4, 51.1. <sup>31</sup>P{<sup>1</sup>H} (CDCl<sub>3</sub>) δ -1.88.

### Synthesis of [Cu(κ<sup>2</sup>-S<sub>2</sub>CNHBz)(κ<sup>2</sup>-dppf)] (**3**)

To a mixture of **1** (0.50 mg, 0.21 mmol) and dppf (125 mg, 0.45 mmol) in a large sample vial was added ca. 10 ml of CH<sub>2</sub>Cl<sub>2</sub>. The solution was manually shaken for ca. 30 min during which time insoluble **1** slowly dispersed to afford a bright orange solution. This was filtered under gravity and the filtrate layered with methanol. Slow mixing of the solvents led to the deposition of orange **3** (0.28 g, 85%). Characterising data: **3**: Anal. Calc. for CuS<sub>2</sub>NP<sub>2</sub>FeC<sub>42</sub>H<sub>36</sub>: C, 63.04; H, 4.50; N, 1.75. Found: C, 63.56; H, 4.61; N, 1.78. <sup>1</sup>H NMR (CDCl<sub>3</sub>) 7.63 (m, 8H, Ph), 7.38 (t, J 4 Hz, 1H, NH), 7.35-7.17 (m, 17H, Ph), 4.65 (d, J 4 Hz, 2H, CH<sub>2</sub>), 4.20 (d, J 2 Hz, 4H, C<sub>5</sub>H<sub>4</sub>), 4.08 (d, J 2 Hz, 4H, C<sub>5</sub>H<sub>4</sub>), <sup>13</sup>C{<sup>1</sup>H} NMR (CDCl<sub>3</sub>) 211.7, 137.6, 135.1, 135.0, 134.9, 134.2, 134.1, 134.0, 129.6, 128.7, 128.4, 128.3, 128.3, 128.0, 127.5, 74.0 (d, J 6 Hz), 71.5 (d, J 6 Hz), 51.0. <sup>31</sup>P{<sup>1</sup>H} NMR (CDCl<sub>3</sub>) δ -16.4.

### Decomposition studies

A hot plate was pre-heated to ~105 °C (to ensure the temperature inside the flask was 90 °C). 300 mg of **1** was dispersed in 90 mL of dmsO in a 100 mL round bottom flask, which was then placed on the pre-heated hot plate and heated for 3 h. Aliquots of 100 μL were taken at 30 min, 60 min, 120 min, and 180 min, and then diluted in 1.9 mL dmsO.

Approximately 300 mg of **1** was dissolved in n-butylamine (ca. 20 ml) to give a dark brown solution. Standing at room temperature for ca. 1 h resulted in the solution slowly decolouring with concomitant generation of CuS as a fine dark green precipitate.

In a sample vial, ca. 50 mg of **1** was suspended in ca. 10 ml of dmsO at room temperature. To this was added ca. 3 drops of BuNH<sub>2</sub>. The yellow suspension slowly dissolved with shaking to give a dark brown solution after ca. 1 h. This solution was left to stand for ca. 1 week resulting in formation of CuS as a fine dark green precipitate

## X-ray crystallography

Crystallographic data for **2** was collected by the EPSRC UK National Crystallography Service at the University of Southampton [S1]. A Rigaku FRE+ diffractometer (Mo-K $\alpha$  radiation, 0.71073 Å) was used equipped with HF Varimax confocal mirrors, an AFC12 goniometer, HG Saturn 724+ detector, and an Oxford Cryo-systems low-temperature device.

For **3** and dibenzylthiourea, data was collected on an Oxford Diffraction Xcalibur S single-crystal diffractometer operating at 150(1) K with a Sapphire 3 CCD plate and graphite-monochromated Cu K $\alpha$  radiation,  $\lambda = 1.54184$  Å (for **3**) or graphite-monochromated Mo K $\alpha$  radiation,  $\lambda = 0.71073$  Å (for dibenzylthiourea).

All datasets were processed using CrysAlisPro [S2] and solutions were solved and refined using Olex-2 [S3]. Crystallographic data is summarised in Table S1.

- S1. S. J. Coles, D. R. Allan, C. M. Beavers, S. J. Teat and S. J. W. Holgate, Leading edge chemical crystallography service provision and its impact on crystallographic data science in the twenty-first century. In: *Structure and Bonding*, 2020, Berlin, Heidelberg, Springer, 1–72.
- S2. CrysAlisPRO, Oxford Diffraction /Agilent Technologies UK Ltd, Yarnton, England.
- S3. O. V. Dolomanov, L. J. Bourhis, R. J. Gildea, J. A. K. Howard and H. Puschmann, *J. Appl. Cryst.*, 2009, **42**, 339-341.

**Table S1.** Crystallographic data and structure refinement

|                                                     | <b>2</b>                                                            | <b>3</b>                                                                          | <b>(BzNH)<sub>2</sub>C=S</b>                                       |
|-----------------------------------------------------|---------------------------------------------------------------------|-----------------------------------------------------------------------------------|--------------------------------------------------------------------|
| Empirical formula                                   | C <sub>44</sub> H <sub>38</sub> NS <sub>2</sub> P <sub>2</sub> Cu   | C <sub>42</sub> H <sub>36</sub> N <sub>2</sub> S <sub>2</sub> P <sub>2</sub> CuFe | C <sub>15</sub> H <sub>16</sub> N <sub>2</sub> S                   |
| CCDC number                                         | 2378475                                                             | 2378476                                                                           | 2378477                                                            |
| Formula weight (Å)                                  | 770.35                                                              | 800.17                                                                            | 256.36                                                             |
| Temperature (K)                                     | 100(1)                                                              | 150(2)                                                                            | 296(1)                                                             |
| Crystal system                                      | monoclinic                                                          | triclinic                                                                         | orthorhombic                                                       |
| Space group                                         | I2/a                                                                | P-1                                                                               | Pbca                                                               |
| Unit cell dimensions                                |                                                                     |                                                                                   |                                                                    |
| <i>a</i> (Å)                                        | 38.4141(11)                                                         | 11.9613(4)                                                                        | 10.8357(10)                                                        |
| <i>b</i> (Å)                                        | 15.0197(4)                                                          | 16.1413(5)                                                                        | 9.3683(7)                                                          |
| <i>c</i> (Å)                                        | 44.0156(12)                                                         | 18.9872(6)                                                                        | 26.594(2)                                                          |
| $\alpha$ (°)                                        | 90                                                                  | 95.408(3)                                                                         | 90                                                                 |
| $\beta$ (°)                                         | 116.023(3)                                                          | 93.201(3)                                                                         | 90                                                                 |
| $\gamma$ (°)                                        | 90                                                                  | 92.636(3)                                                                         | 90                                                                 |
| Volume (Å <sup>3</sup> )                            | 22930.3(12)                                                         | 3639.2(10)                                                                        | 2699.6(4)                                                          |
| <i>Z</i>                                            | 24                                                                  | 4                                                                                 | 8                                                                  |
| Density (calc.) (g/cm <sup>3</sup> )                | 1.339                                                               | 1.461                                                                             | 1.261                                                              |
| Absorption coefficient                              | 0.797                                                               | 6.061                                                                             | 0.223                                                              |
| F(000)                                              | 9600                                                                | 1648                                                                              | 1088                                                               |
| Crystal size (mm)                                   | 0.10 × 0.10 × 0.10                                                  | 0.37 × 0.28 × 0.17                                                                | 0.30 × 0.25 × 0.20                                                 |
| $\theta$ Range for data collection (°)              | 3.88 to 61.02                                                       | 6.88 to 144.52                                                                    | 5.95 to 58.56                                                      |
| Index ranges                                        | -54 ≤ <i>h</i> ≤ 54<br>-21 ≤ <i>k</i> ≤ 20<br>-62 ≤ <i>l</i> ≤ 62   | -14 ≤ <i>h</i> ≤ 9<br>-19 ≤ <i>k</i> ≤ 19<br>-18 ≤ <i>l</i> ≤ 23                  | -8 ≤ <i>h</i> ≤ 13<br>-12 ≤ <i>k</i> ≤ 9<br>-34 ≤ <i>l</i> ≤ 27    |
| Reflections collected                               | 178339                                                              | 26444                                                                             | 9535                                                               |
| Independent reflections                             | 35000                                                               | 14004                                                                             | 3163                                                               |
| Data / restraints / parameters                      | 35000/0/1351                                                        | 14004/18/929                                                                      | 3163/0/163                                                         |
| Goodness-of-fit on <i>F</i> <sup>2</sup>            | 0.992                                                               | 1.047                                                                             | 1.115                                                              |
| Final <i>R</i> indices [ <i>I</i> > 2σ( <i>I</i> )] | <i>R</i> <sub>1</sub> = 0.0538,<br>w <i>R</i> <sub>2</sub> = 0.0983 | <i>R</i> <sub>1</sub> = 0.0463<br>w <i>R</i> <sub>2</sub> = 0.1207                | <i>R</i> <sub>1</sub> = 0.0545<br>w <i>R</i> <sub>2</sub> = 0.1211 |
| <i>R</i> indices (all data)                         | <i>R</i> <sub>1</sub> = 0.1047,<br>w <i>R</i> <sub>2</sub> = 0.1153 | <i>R</i> <sub>1</sub> = 0.0623<br>w <i>R</i> <sub>2</sub> = 0.1292                | <i>R</i> <sub>1</sub> = 0.0713<br>w <i>R</i> <sub>2</sub> = 0.1300 |
| Largest diff. peak and hole (e.Å <sup>-3</sup> )    | 0.50/-0.48                                                          | 0.76/-0.43                                                                        | 0.27/-0.33                                                         |

## Molecular structure of 2

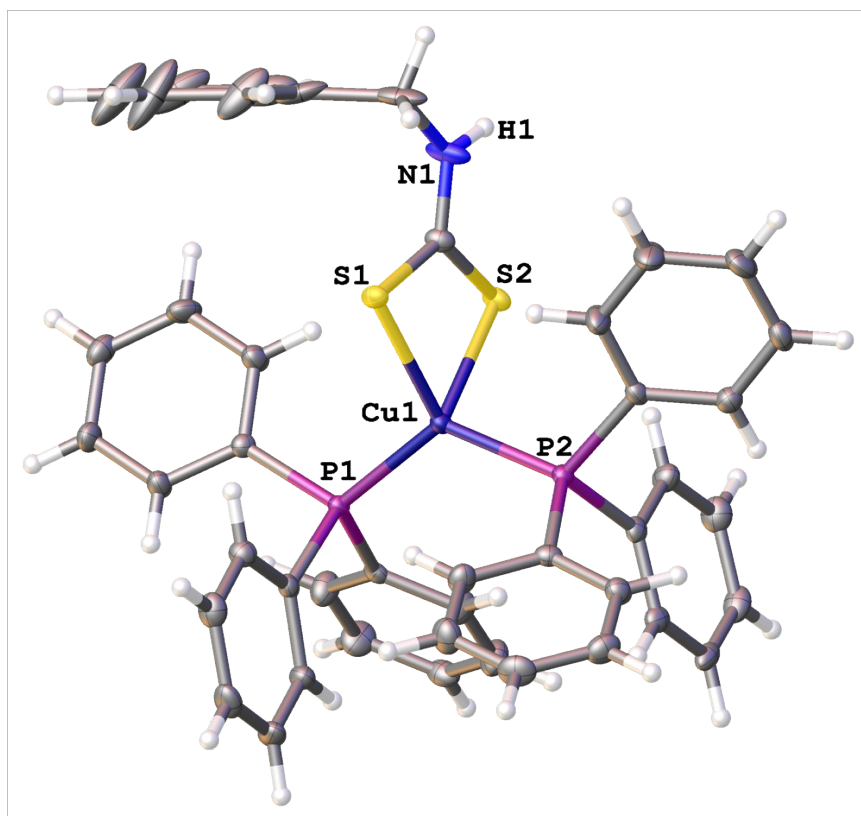

**Table 4 Bond Lengths.**

| Atom | Atom | Length/Å   | Atom | Atom | Length/Å  |
|------|------|------------|------|------|-----------|
| Cu1  | S1   | 2.3911 (6) | C60  | C61  | 1.391 (3) |
| Cu1  | S2   | 2.4146 (6) | C61  | C62  | 1.381 (3) |
| Cu1  | P1   | 2.2428 (6) | C62  | C63  | 1.389 (3) |
| Cu1  | P2   | 2.2497 (6) | C63  | C64  | 1.380 (3) |
| S1   | C1   | 1.703 (2)  | C65  | C66  | 1.389 (3) |
| S2   | C1   | 1.729 (2)  | C65  | C70  | 1.392 (3) |
| P1   | C9   | 1.827 (2)  | C66  | C67  | 1.393 (3) |
| P1   | C15  | 1.822 (2)  | C67  | C68  | 1.383 (3) |
| P1   | C21  | 1.830 (2)  | C68  | C69  | 1.376 (3) |
| P2   | C27  | 1.829 (2)  | C69  | C70  | 1.388 (3) |
| P2   | C33  | 1.829 (2)  | C71  | C72  | 1.386 (3) |
| P2   | C39  | 1.834 (2)  | C71  | C76  | 1.397 (3) |
| N1   | C1   | 1.325 (3)  | C72  | C73  | 1.393 (3) |
| N1   | C2   | 1.461 (3)  | C73  | C74  | 1.381 (3) |
| C2   | C3   | 1.516 (4)  | C74  | C75  | 1.383 (4) |
| C3   | C4   | 1.379 (4)  | C75  | C76  | 1.391 (3) |
| C3   | C8   | 1.383 (4)  | C77  | C78  | 1.400 (3) |
| C4   | C5   | 1.387 (4)  | C77  | C82  | 1.387 (3) |
| C5   | C6   | 1.388 (4)  | C78  | C79  | 1.394 (3) |
| C6   | C7   | 1.386 (5)  | C79  | C80  | 1.384 (3) |
| C7   | C8   | 1.381 (4)  | C80  | C81  | 1.381 (3) |

**Table 4 Bond Lengths.**

| Atom | Atom | Length/Å   | Atom | Atom | Length/Å   |
|------|------|------------|------|------|------------|
| C9   | C10  | 1.391 (3)  | C81  | C82  | 1.388 (3)  |
| C9   | C14  | 1.387 (3)  | C83  | C84  | 1.394 (3)  |
| C10  | C11  | 1.382 (3)  | C83  | C88  | 1.398 (3)  |
| C11  | C12  | 1.377 (4)  | C84  | C85  | 1.395 (3)  |
| C12  | C13  | 1.388 (3)  | C85  | C86  | 1.377 (3)  |
| C13  | C14  | 1.396 (3)  | C86  | C87  | 1.385 (3)  |
| C15  | C16  | 1.394 (3)  | C87  | C88  | 1.382 (3)  |
| C15  | C20  | 1.400 (3)  | Cu3  | S5   | 2.4219 (6) |
| C16  | C17  | 1.395 (3)  | Cu3  | S6   | 2.3841 (6) |
| C17  | C18  | 1.385 (3)  | Cu3  | P5   | 2.2522 (6) |
| C18  | C19  | 1.384 (3)  | Cu3  | P6   | 2.2543 (6) |
| C19  | C20  | 1.382 (3)  | S5   | C89  | 1.731 (2)  |
| C21  | C22  | 1.390 (3)  | S6   | C89  | 1.707 (2)  |
| C21  | C26  | 1.399 (3)  | P5   | C97  | 1.832 (2)  |
| C22  | C23  | 1.393 (3)  | P5   | C103 | 1.820 (2)  |
| C23  | C24  | 1.384 (3)  | P5   | C109 | 1.833 (2)  |
| C24  | C25  | 1.393 (3)  | P6   | C115 | 1.826 (2)  |
| C25  | C26  | 1.386 (3)  | P6   | C121 | 1.829 (2)  |
| C27  | C28  | 1.398 (3)  | P6   | C127 | 1.837 (2)  |
| C27  | C32  | 1.394 (3)  | N3   | C89  | 1.324 (3)  |
| C28  | C29  | 1.390 (3)  | N3   | C90  | 1.461 (3)  |
| C29  | C30  | 1.378 (3)  | C90  | C91  | 1.518 (3)  |
| C30  | C31  | 1.386 (3)  | C91  | C92  | 1.378 (3)  |
| C31  | C32  | 1.393 (3)  | C91  | C96  | 1.385 (3)  |
| C33  | C34  | 1.391 (3)  | C92  | C93  | 1.390 (3)  |
| C33  | C38  | 1.397 (3)  | C93  | C94  | 1.383 (4)  |
| C34  | C35  | 1.383 (3)  | C94  | C95  | 1.376 (4)  |
| C35  | C36  | 1.387 (3)  | C95  | C96  | 1.391 (4)  |
| C36  | C37  | 1.383 (3)  | C97  | C98  | 1.402 (3)  |
| C37  | C38  | 1.392 (3)  | C97  | C102 | 1.393 (3)  |
| C39  | C40  | 1.398 (3)  | C98  | C99  | 1.384 (3)  |
| C39  | C44  | 1.388 (3)  | C99  | C100 | 1.384 (3)  |
| C40  | C41  | 1.385 (3)  | C100 | C101 | 1.385 (3)  |
| C41  | C42  | 1.389 (3)  | C101 | C102 | 1.387 (3)  |
| C42  | C43  | 1.384 (3)  | C103 | C104 | 1.400 (3)  |
| C43  | C44  | 1.394 (3)  | C103 | C108 | 1.397 (3)  |
| Cu2  | S3   | 2.4004 (6) | C104 | C105 | 1.384 (3)  |
| Cu2  | S4   | 2.4124 (6) | C105 | C106 | 1.385 (3)  |
| Cu2  | P3   | 2.2382 (6) | C106 | C107 | 1.383 (3)  |
| Cu2  | P4   | 2.2490 (6) | C107 | C108 | 1.387 (3)  |
| S3   | C45  | 1.709 (2)  | C109 | C110 | 1.394 (3)  |
| S4   | C45  | 1.726 (2)  | C109 | C114 | 1.393 (3)  |
| P3   | C53  | 1.833 (2)  | C110 | C111 | 1.382 (3)  |

**Table 4 Bond Lengths.**

| Atom | Atom | Length/Å  | Atom | Atom | Length/Å  |
|------|------|-----------|------|------|-----------|
| P3   | C59  | 1.828 (2) | C111 | C112 | 1.393 (3) |
| P3   | C65  | 1.824 (2) | C112 | C113 | 1.377 (3) |
| P4   | C71  | 1.825 (2) | C113 | C114 | 1.391 (3) |
| P4   | C77  | 1.830 (2) | C115 | C116 | 1.389 (3) |
| P4   | C83  | 1.831 (2) | C115 | C120 | 1.403 (3) |
| N2   | C45  | 1.325 (3) | C116 | C117 | 1.394 (3) |
| N2   | C46  | 1.455 (3) | C117 | C118 | 1.385 (3) |
| C46  | C47  | 1.520 (3) | C118 | C119 | 1.380 (3) |
| C47  | C48  | 1.394 (3) | C119 | C120 | 1.389 (3) |
| C47  | C52  | 1.359 (4) | C121 | C122 | 1.392 (3) |
| C48  | C49  | 1.390 (4) | C121 | C126 | 1.393 (3) |
| C49  | C50  | 1.368 (5) | C122 | C123 | 1.395 (3) |
| C50  | C51  | 1.377 (4) | C123 | C124 | 1.379 (3) |
| C51  | C52  | 1.393 (4) | C124 | C125 | 1.382 (3) |
| C53  | C54  | 1.399 (3) | C125 | C126 | 1.386 (3) |
| C53  | C58  | 1.387 (3) | C127 | C128 | 1.396 (3) |
| C54  | C55  | 1.385 (3) | C127 | C132 | 1.396 (3) |
| C55  | C56  | 1.385 (4) | C128 | C129 | 1.388 (3) |
| C56  | C57  | 1.383 (3) | C129 | C130 | 1.384 (3) |
| C57  | C58  | 1.393 (3) | C130 | C131 | 1.394 (3) |
| C59  | C60  | 1.395 (3) | C131 | C132 | 1.386 (3) |
| C59  | C64  | 1.402 (3) |      |      |           |

**Table 5 Bond Angles.**

| Atom | Atom | Atom | Angle/°     | Atom | Atom | Atom | Angle/°     |
|------|------|------|-------------|------|------|------|-------------|
| S1   | Cu1  | S2   | 75.778 (19) | C60  | C59  | P3   | 124.97 (17) |
| P1   | Cu1  | S1   | 110.98 (2)  | C60  | C59  | C64  | 118.3 (2)   |
| P1   | Cu1  | S2   | 115.03 (2)  | C64  | C59  | P3   | 116.59 (16) |
| P1   | Cu1  | P2   | 125.64 (2)  | C61  | C60  | C59  | 120.2 (2)   |
| P2   | Cu1  | S1   | 114.91 (2)  | C62  | C61  | C60  | 120.7 (2)   |
| P2   | Cu1  | S2   | 103.27 (2)  | C61  | C62  | C63  | 119.6 (2)   |
| C1   | S1   | Cu1  | 83.06 (7)   | C64  | C63  | C62  | 119.9 (2)   |
| C1   | S2   | Cu1  | 81.84 (7)   | C63  | C64  | C59  | 121.2 (2)   |
| C9   | P1   | Cu1  | 117.11 (7)  | C66  | C65  | P3   | 118.52 (16) |
| C9   | P1   | C21  | 103.74 (10) | C66  | C65  | C70  | 118.9 (2)   |
| C15  | P1   | Cu1  | 115.89 (7)  | C70  | C65  | P3   | 122.57 (17) |
| C15  | P1   | C9   | 104.05 (10) | C65  | C66  | C67  | 120.3 (2)   |
| C15  | P1   | C21  | 103.07 (9)  | C68  | C67  | C66  | 120.0 (2)   |
| C21  | P1   | Cu1  | 111.37 (8)  | C69  | C68  | C67  | 120.1 (2)   |
| C27  | P2   | Cu1  | 118.18 (7)  | C68  | C69  | C70  | 120.0 (2)   |
| C27  | P2   | C33  | 102.69 (10) | C69  | C70  | C65  | 120.6 (2)   |



**Table 5 Bond Angles.**

| Atom | Atom | Atom | Angle/°    | Atom | Atom | Atom | Angle/°    |
|------|------|------|------------|------|------|------|------------|
| C27  | P2   | C39  | 105.49(10) | C72  | C71  | P4   | 122.19(17) |
| C33  | P2   | Cu1  | 116.54(7)  | C72  | C71  | C76  | 118.7(2)   |
| C33  | P2   | C39  | 101.89(9)  | C76  | C71  | P4   | 118.90(18) |
| C39  | P2   | Cu1  | 110.30(8)  | C71  | C72  | C73  | 120.9(2)   |
| C1   | N1   | C2   | 123.85(19) | C74  | C73  | C72  | 119.8(2)   |
| S1   | C1   | S2   | 118.67(12) | C73  | C74  | C75  | 120.1(2)   |
| N1   | C1   | S1   | 122.09(17) | C74  | C75  | C76  | 120.0(2)   |
| N1   | C1   | S2   | 119.25(16) | C75  | C76  | C71  | 120.5(2)   |
| N1   | C2   | C3   | 112.9(2)   | C78  | C77  | P4   | 122.37(16) |
| C4   | C3   | C2   | 121.9(3)   | C82  | C77  | P4   | 118.35(16) |
| C4   | C3   | C8   | 118.7(3)   | C82  | C77  | C78  | 119.3(2)   |
| C8   | C3   | C2   | 119.3(3)   | C79  | C78  | C77  | 120.0(2)   |
| C3   | C4   | C5   | 121.1(3)   | C80  | C79  | C78  | 119.9(2)   |
| C4   | C5   | C6   | 119.9(3)   | C81  | C80  | C79  | 120.3(2)   |
| C7   | C6   | C5   | 118.9(3)   | C80  | C81  | C82  | 120.0(2)   |
| C8   | C7   | C6   | 120.6(3)   | C77  | C82  | C81  | 120.5(2)   |
| C7   | C8   | C3   | 120.7(3)   | C84  | C83  | P4   | 125.08(17) |
| C10  | C9   | P1   | 118.03(18) | C84  | C83  | C88  | 118.8(2)   |
| C14  | C9   | P1   | 123.53(16) | C88  | C83  | P4   | 116.05(16) |
| C14  | C9   | C10  | 118.4(2)   | C83  | C84  | C85  | 119.9(2)   |
| C11  | C10  | C9   | 120.9(2)   | C86  | C85  | C84  | 120.6(2)   |
| C12  | C11  | C10  | 120.6(2)   | C85  | C86  | C87  | 119.8(2)   |
| C11  | C12  | C13  | 119.5(2)   | C88  | C87  | C86  | 120.1(2)   |
| C12  | C13  | C14  | 119.8(2)   | C87  | C88  | C83  | 120.7(2)   |
| C9   | C14  | C13  | 120.8(2)   | S6   | Cu3  | S5   | 75.685(19) |
| C16  | C15  | P1   | 118.36(16) | P5   | Cu3  | S5   | 112.95(2)  |
| C16  | C15  | C20  | 119.1(2)   | P5   | Cu3  | S6   | 113.07(2)  |
| C20  | C15  | P1   | 122.55(16) | P5   | Cu3  | P6   | 124.11(2)  |
| C15  | C16  | C17  | 119.8(2)   | P6   | Cu3  | S5   | 106.31(2)  |
| C18  | C17  | C16  | 120.5(2)   | P6   | Cu3  | S6   | 114.06(2)  |
| C19  | C18  | C17  | 119.8(2)   | C89  | S5   | Cu3  | 82.20(7)   |
| C20  | C19  | C18  | 120.2(2)   | C89  | S6   | Cu3  | 83.83(7)   |
| C19  | C20  | C15  | 120.6(2)   | C97  | P5   | Cu3  | 116.82(7)  |
| C22  | C21  | P1   | 123.17(16) | C97  | P5   | C109 | 104.59(10) |
| C22  | C21  | C26  | 119.1(2)   | C103 | P5   | Cu3  | 112.03(8)  |
| C26  | C21  | P1   | 117.31(16) | C103 | P5   | C97  | 100.91(9)  |
| C21  | C22  | C23  | 120.1(2)   | C103 | P5   | C109 | 105.44(10) |
| C24  | C23  | C22  | 120.7(2)   | C109 | P5   | Cu3  | 115.47(7)  |
| C23  | C24  | C25  | 119.4(2)   | C115 | P6   | Cu3  | 110.59(8)  |
| C26  | C25  | C24  | 120.1(2)   | C115 | P6   | C121 | 104.85(10) |
| C25  | C26  | C21  | 120.6(2)   | C115 | P6   | C127 | 103.46(10) |
| C28  | C27  | P2   | 117.93(17) | C121 | P6   | Cu3  | 117.81(7)  |
| C32  | C27  | P2   | 123.71(16) | C121 | P6   | C127 | 99.80(10)  |

**Table 5 Bond Angles.**

| <b>Atom Atom Atom</b> | <b>Angle/°</b> | <b>Atom Atom Atom</b> | <b>Angle/°</b> |
|-----------------------|----------------|-----------------------|----------------|
| C32 C27 C28           | 118.3(2)       | C127 P6 Cu3           | 118.50(7)      |
| C29 C28 C27           | 120.4(2)       | C89 N3 C90            | 125.05(18)     |
| C30 C29 C28           | 120.4(2)       | S6 C89 S5             | 118.08(12)     |
| C29 C30 C31           | 120.3(2)       | N3 C89 S5             | 118.88(15)     |
| C30 C31 C32           | 119.3(2)       | N3 C89 S6             | 123.03(15)     |
| C31 C32 C27           | 121.3(2)       | N3 C90 C91            | 114.21(19)     |
| C34 C33 P2            | 117.48(16)     | C92 C91 C90           | 122.3(2)       |
| C34 C33 C38           | 118.8(2)       | C92 C91 C96           | 118.8(2)       |
| C38 C33 P2            | 123.74(17)     | C96 C91 C90           | 118.8(2)       |
| C35 C34 C33           | 120.6(2)       | C91 C92 C93           | 121.2(2)       |
| C34 C35 C36           | 120.4(2)       | C94 C93 C92           | 119.6(3)       |
| C37 C36 C35           | 119.7(2)       | C95 C94 C93           | 119.7(3)       |
| C36 C37 C38           | 120.0(2)       | C94 C95 C96           | 120.4(2)       |
| C37 C38 C33           | 120.4(2)       | C91 C96 C95           | 120.3(3)       |
| C40 C39 P2            | 116.58(16)     | C98 C97 P5            | 122.28(16)     |
| C44 C39 P2            | 124.53(17)     | C102 C97 P5           | 118.44(16)     |
| C44 C39 C40           | 118.6(2)       | C102 C97 C98          | 119.26(19)     |
| C41 C40 C39           | 120.8(2)       | C99 C98 C97           | 120.2(2)       |
| C40 C41 C42           | 120.2(2)       | C100 C99 C98          | 120.2(2)       |
| C43 C42 C41           | 119.4(2)       | C99 C100 C101         | 119.8(2)       |
| C42 C43 C44           | 120.4(2)       | C100 C101 C102        | 120.7(2)       |
| C39 C44 C43           | 120.5(2)       | C101 C102 C97         | 119.8(2)       |
| S3 Cu2 S4             | 75.676(19)     | C104 C103 P5          | 116.59(16)     |
| P3 Cu2 S3             | 114.58(2)      | C108 C103 P5          | 125.00(16)     |
| P3 Cu2 S4             | 112.87(2)      | C108 C103 C104        | 118.0(2)       |
| P3 Cu2 P4             | 123.76(2)      | C105 C104 C103        | 121.3(2)       |
| P4 Cu2 S3             | 111.83(2)      | C104 C105 C106        | 120.0(2)       |
| P4 Cu2 S4             | 107.83(2)      | C107 C106 C105        | 119.5(2)       |
| C45 S3 Cu2            | 82.35(7)       | C106 C107 C108        | 120.8(2)       |
| C45 S4 Cu2            | 81.67(7)       | C107 C108 C103        | 120.5(2)       |
| C53 P3 Cu2            | 114.88(7)      | C110 C109 P5          | 123.76(16)     |
| C59 P3 Cu2            | 113.42(8)      | C114 C109 P5          | 117.31(16)     |
| C59 P3 C53            | 104.51(10)     | C114 C109 C110        | 118.9(2)       |
| C65 P3 Cu2            | 115.77(7)      | C111 C110 C109        | 120.6(2)       |
| C65 P3 C53            | 104.39(11)     | C110 C111 C112        | 119.9(2)       |
| C65 P3 C59            | 102.43(9)      | C113 C112 C111        | 120.0(2)       |
| C71 P4 Cu2            | 115.71(7)      | C112 C113 C114        | 120.2(2)       |
| C71 P4 C77            | 103.38(10)     | C113 C114 C109        | 120.3(2)       |
| C71 P4 C83            | 105.40(10)     | C116 C115 P6          | 123.60(17)     |
| C77 P4 Cu2            | 116.97(7)      | C116 C115 C120        | 118.3(2)       |
| C77 P4 C83            | 101.90(9)      | C120 C115 P6          | 117.88(16)     |
| C83 P4 Cu2            | 111.92(8)      | C115 C116 C117        | 120.6(2)       |
| C45 N2 C46            | 124.83(18)     | C118 C117 C116        | 120.2(2)       |

**Table 5 Bond Angles.**

| <b>Atom Atom Atom</b> | <b>Angle/°</b> | <b>Atom Atom Atom</b> | <b>Angle/°</b> |
|-----------------------|----------------|-----------------------|----------------|
| S3 C45 S4             | 118.52 (12)    | C119 C118 C117        | 120.0 (2)      |
| N2 C45 S3             | 122.35 (16)    | C118 C119 C120        | 119.8 (2)      |
| N2 C45 S4             | 119.10 (15)    | C119 C120 C115        | 121.0 (2)      |
| N2 C46 C47            | 114.0 (2)      | C122 C121 P6          | 119.07 (17)    |
| C48 C47 C46           | 117.8 (2)      | C122 C121 C126        | 118.6 (2)      |
| C52 C47 C46           | 122.9 (2)      | C126 C121 P6          | 122.24 (16)    |
| C52 C47 C48           | 119.3 (2)      | C121 C122 C123        | 120.7 (2)      |
| C49 C48 C47           | 119.4 (3)      | C124 C123 C122        | 120.0 (2)      |
| C50 C49 C48           | 120.7 (3)      | C123 C124 C125        | 119.8 (2)      |
| C49 C50 C51           | 119.9 (3)      | C124 C125 C126        | 120.6 (2)      |
| C50 C51 C52           | 119.4 (3)      | C125 C126 C121        | 120.4 (2)      |
| C47 C52 C51           | 121.3 (3)      | C128 C127 P6          | 123.38 (17)    |
| C54 C53 P3            | 118.84 (18)    | C132 C127 P6          | 117.38 (16)    |
| C58 C53 P3            | 122.34 (18)    | C132 C127 C128        | 119.1 (2)      |
| C58 C53 C54           | 118.6 (2)      | C129 C128 C127        | 120.0 (2)      |
| C55 C54 C53           | 120.7 (2)      | C130 C129 C128        | 120.9 (2)      |
| C56 C55 C54           | 120.2 (2)      | C129 C130 C131        | 119.3 (2)      |
| C57 C56 C55           | 119.8 (2)      | C132 C131 C130        | 120.3 (2)      |
| C56 C57 C58           | 120.1 (3)      | C131 C132 C127        | 120.5 (2)      |
| C53 C58 C57           | 120.7 (2)      |                       |                |

### Molecular structure of 3

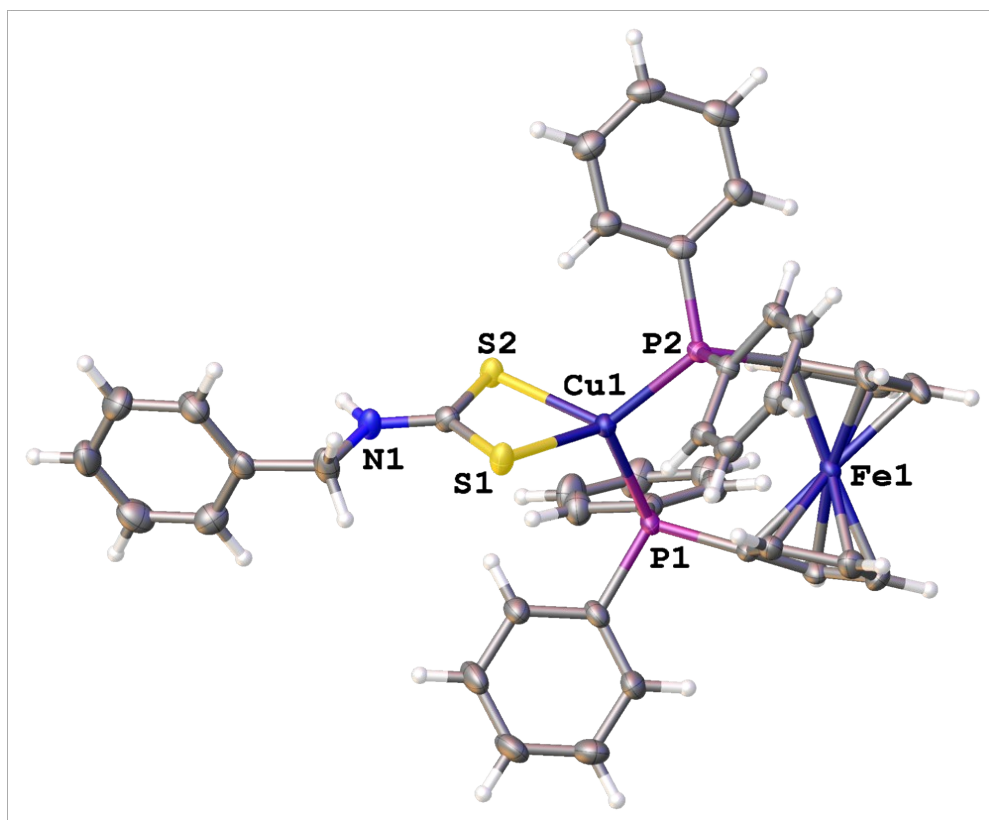

**Table 4 Bond Lengths.**

| Atom | Atom | Length/Å   | Atom | Atom | Length/Å   |
|------|------|------------|------|------|------------|
| Cu1  | S1   | 2.4011 (9) | Cu02 | P4   | 2.2438 (9) |
| Cu1  | S2   | 2.4113 (9) | Fe2  | C43  | 2.033 (3)  |
| Cu1  | P1   | 2.2712 (8) | Fe2  | C44  | 2.039 (3)  |
| Cu1  | P2   | 2.2360 (8) | Fe2  | C45  | 2.056 (3)  |
| Fe1  | C1   | 2.035 (3)  | Fe2  | C46  | 2.056 (3)  |
| Fe1  | C2   | 2.066 (3)  | Fe2  | C47  | 2.030 (3)  |
| Fe1  | C3   | 2.061 (3)  | Fe2  | C48  | 2.045 (3)  |
| Fe1  | C4   | 2.054 (4)  | Fe2  | C49  | 2.034 (3)  |
| Fe1  | C5   | 2.030 (3)  | Fe2  | C50  | 2.045 (3)  |
| Fe1  | C6   | 2.050 (3)  | Fe2  | C51  | 2.059 (3)  |
| Fe1  | C7   | 2.034 (3)  | Fe2  | C52  | 2.039 (3)  |
| Fe1  | C8   | 2.056 (3)  | S3   | C77  | 1.708 (3)  |
| Fe1  | C9   | 2.057 (3)  | S4   | C77  | 1.713 (3)  |
| Fe1  | C10  | 2.049 (3)  | P3   | C43  | 1.806 (3)  |
| S1   | C35  | 1.705 (3)  | P3   | C53  | 1.836 (3)  |
| S2   | C35  | 1.718 (3)  | P3   | C59  | 1.834 (3)  |
| P1   | C1   | 1.804 (3)  | P4   | C48  | 1.811 (3)  |
| P1   | C23  | 1.832 (3)  | P4   | C65  | 1.831 (3)  |
| P1   | C29  | 1.840 (3)  | P4   | C71  | 1.835 (3)  |
| P2   | C6   | 1.814 (3)  | N2   | C77  | 1.338 (4)  |

**Table 4 Bond Lengths.**

| Atom | Atom | Length/Å  | Atom | Atom | Length/Å   |
|------|------|-----------|------|------|------------|
| P2   | C11  | 1.832 (3) | N2   | C78  | 1.447 (4)  |
| P2   | C17  | 1.831 (3) | C43  | C44  | 1.430 (4)  |
| N1   | C35  | 1.337 (4) | C43  | C47  | 1.429 (5)  |
| N1   | C36  | 1.462 (4) | C44  | C45  | 1.412 (5)  |
| C1   | C2   | 1.432 (4) | C45  | C46  | 1.414 (5)  |
| C1   | C5   | 1.444 (5) | C46  | C47  | 1.435 (5)  |
| C2   | C3   | 1.418 (5) | C48  | C49  | 1.433 (5)  |
| C3   | C4   | 1.406 (6) | C48  | C52  | 1.440 (5)  |
| C4   | C5   | 1.424 (5) | C49  | C50  | 1.422 (5)  |
| C6   | C7   | 1.437 (5) | C50  | C51  | 1.423 (6)  |
| C6   | C10  | 1.437 (4) | C51  | C52  | 1.419 (5)  |
| C7   | C8   | 1.421 (5) | C53  | C54  | 1.391 (5)  |
| C8   | C9   | 1.418 (6) | C53  | C58  | 1.397 (5)  |
| C9   | C10  | 1.429 (5) | C54  | C55  | 1.394 (5)  |
| C11  | C12  | 1.402 (5) | C55  | C56  | 1.391 (6)  |
| C11  | C16  | 1.394 (4) | C56  | C57  | 1.368 (6)  |
| C12  | C13  | 1.385 (5) | C57  | C58  | 1.388 (5)  |
| C13  | C14  | 1.382 (5) | C59  | C60  | 1.395 (5)  |
| C14  | C15  | 1.388 (6) | C59  | C64  | 1.377 (5)  |
| C15  | C16  | 1.398 (5) | C60  | C61  | 1.379 (5)  |
| C17  | C18  | 1.398 (4) | C61  | C62  | 1.379 (6)  |
| C17  | C22  | 1.397 (4) | C62  | C63  | 1.373 (6)  |
| C18  | C19  | 1.387 (5) | C63  | C64  | 1.402 (5)  |
| C19  | C20  | 1.399 (5) | C65  | C66  | 1.387 (5)  |
| C20  | C21  | 1.381 (5) | C65  | C70  | 1.392 (5)  |
| C21  | C22  | 1.390 (5) | C66  | C67  | 1.400 (5)  |
| C23  | C24  | 1.391 (5) | C67  | C68  | 1.367 (7)  |
| C23  | C28  | 1.391 (5) | C68  | C69  | 1.376 (7)  |
| C24  | C25  | 1.398 (6) | C69  | C70  | 1.395 (5)  |
| C25  | C26  | 1.384 (6) | C71  | C72  | 1.400 (4)  |
| C26  | C27  | 1.365 (5) | C71  | C76  | 1.395 (4)  |
| C27  | C28  | 1.392 (5) | C72  | C73  | 1.390 (5)  |
| C29  | C30  | 1.383 (5) | C73  | C74  | 1.385 (5)  |
| C29  | C34  | 1.397 (5) | C74  | C75  | 1.393 (5)  |
| C30  | C31  | 1.397 (5) | C75  | C76  | 1.392 (5)  |
| C31  | C32  | 1.386 (6) | C78  | C79  | 1.507 (5)  |
| C32  | C33  | 1.387 (6) | C79  | C80  | 1.449 (15) |
| C33  | C34  | 1.400 (5) | C79  | C84  | 1.30 (2)   |
| C36  | C37  | 1.509 (5) | C79  | C85  | 1.32 (2)   |
| C37  | C38  | 1.386 (5) | C79  | C89  | 1.49 (2)   |
| C37  | C42  | 1.391 (5) | C80  | C81  | 1.423 (19) |
| C38  | C39  | 1.384 (6) | C81  | C82  | 1.379 (16) |
| C39  | C40  | 1.390 (6) | C82  | C83  | 1.32 (2)   |

**Table 4 Bond Lengths.**

| Atom | Atom | Length/Å   | Atom | Atom | Length/Å |
|------|------|------------|------|------|----------|
| C40  | C41  | 1.392 (6)  | C83  | C84  | 1.37 (2) |
| C41  | C42  | 1.363 (6)  | C85  | C86  | 1.37 (3) |
| Cu02 | S3   | 2.4358 (9) | C86  | C87  | 1.44 (2) |
| Cu02 | S4   | 2.3805 (9) | C87  | C88  | 1.30 (3) |
| Cu02 | P3   | 2.2609 (9) | C88  | C89  | 1.37 (3) |

**Table 5 Bond Angles.**

| Atom | Atom | Atom | Angle/°     | Atom | Atom | Atom | Angle/°     |
|------|------|------|-------------|------|------|------|-------------|
| S1   | Cu1  | S2   | 75.51 (3)   | P4   | Cu02 | S4   | 117.45 (4)  |
| P1   | Cu1  | S1   | 115.42 (3)  | P4   | Cu02 | P3   | 110.42 (3)  |
| P1   | Cu1  | S2   | 108.54 (3)  | C43  | Fe2  | C44  | 41.14 (12)  |
| P2   | Cu1  | S1   | 116.69 (3)  | C43  | Fe2  | C45  | 68.73 (13)  |
| P2   | Cu1  | S2   | 122.72 (3)  | C43  | Fe2  | C46  | 68.87 (13)  |
| P2   | Cu1  | P1   | 113.05 (3)  | C43  | Fe2  | C48  | 113.52 (12) |
| C1   | Fe1  | C2   | 40.87 (12)  | C43  | Fe2  | C49  | 142.52 (13) |
| C1   | Fe1  | C3   | 68.65 (13)  | C43  | Fe2  | C50  | 176.69 (14) |
| C1   | Fe1  | C4   | 69.22 (13)  | C43  | Fe2  | C51  | 137.78 (15) |
| C1   | Fe1  | C6   | 115.11 (12) | C43  | Fe2  | C52  | 111.96 (14) |
| C1   | Fe1  | C8   | 171.04 (15) | C44  | Fe2  | C45  | 40.36 (14)  |
| C1   | Fe1  | C9   | 132.19 (15) | C44  | Fe2  | C46  | 68.06 (15)  |
| C1   | Fe1  | C10  | 108.65 (14) | C44  | Fe2  | C48  | 143.78 (14) |
| C3   | Fe1  | C2   | 40.21 (15)  | C44  | Fe2  | C50  | 135.56 (14) |
| C4   | Fe1  | C2   | 67.82 (15)  | C44  | Fe2  | C51  | 110.92 (14) |
| C4   | Fe1  | C3   | 39.97 (16)  | C44  | Fe2  | C52  | 114.20 (14) |
| C4   | Fe1  | C8   | 115.23 (16) | C45  | Fe2  | C51  | 112.25 (15) |
| C4   | Fe1  | C9   | 148.42 (16) | C46  | Fe2  | C45  | 40.23 (15)  |
| C5   | Fe1  | C1   | 41.62 (13)  | C46  | Fe2  | C51  | 140.37 (15) |
| C5   | Fe1  | C2   | 68.55 (14)  | C47  | Fe2  | C43  | 41.19 (13)  |
| C5   | Fe1  | C3   | 68.10 (14)  | C47  | Fe2  | C44  | 68.98 (14)  |
| C5   | Fe1  | C4   | 40.81 (13)  | C47  | Fe2  | C45  | 68.73 (14)  |
| C5   | Fe1  | C6   | 106.49 (13) | C47  | Fe2  | C46  | 41.12 (13)  |
| C5   | Fe1  | C7   | 113.75 (14) | C47  | Fe2  | C48  | 110.17 (13) |
| C5   | Fe1  | C8   | 146.63 (16) | C47  | Fe2  | C49  | 111.81 (14) |
| C5   | Fe1  | C9   | 170.64 (15) | C47  | Fe2  | C50  | 140.53 (16) |
| C5   | Fe1  | C10  | 130.48 (13) | C47  | Fe2  | C51  | 178.47 (15) |
| C6   | Fe1  | C2   | 149.48 (14) | C47  | Fe2  | C52  | 138.02 (14) |
| C6   | Fe1  | C3   | 167.86 (15) | C48  | Fe2  | C45  | 175.52 (15) |
| C6   | Fe1  | C4   | 129.02 (14) | C48  | Fe2  | C46  | 136.21 (14) |
| C6   | Fe1  | C8   | 68.82 (13)  | C48  | Fe2  | C50  | 69.13 (14)  |
| C6   | Fe1  | C9   | 68.61 (13)  | C48  | Fe2  | C51  | 68.95 (13)  |
| C7   | Fe1  | C1   | 147.34 (13) | C49  | Fe2  | C44  | 174.93 (14) |

**Table 5 Bond Angles.**

| Atom | Atom | Atom | Angle/°     | Atom | Atom | Atom | Angle/°     |
|------|------|------|-------------|------|------|------|-------------|
| C7   | Fe1  | C2   | 169.18 (14) | C49  | Fe2  | C45  | 134.81 (15) |
| C7   | Fe1  | C3   | 129.71 (15) | C49  | Fe2  | C46  | 109.02 (15) |
| C7   | Fe1  | C4   | 106.55 (15) | C49  | Fe2  | C48  | 41.12 (14)  |
| C7   | Fe1  | C6   | 41.20 (13)  | C49  | Fe2  | C50  | 40.79 (14)  |
| C7   | Fe1  | C8   | 40.66 (13)  | C49  | Fe2  | C51  | 68.43 (15)  |
| C7   | Fe1  | C9   | 68.27 (15)  | C49  | Fe2  | C52  | 68.82 (15)  |
| C7   | Fe1  | C10  | 68.96 (15)  | C50  | Fe2  | C45  | 108.78 (14) |
| C8   | Fe1  | C2   | 132.13 (14) | C50  | Fe2  | C46  | 110.79 (16) |
| C8   | Fe1  | C3   | 109.30 (15) | C50  | Fe2  | C51  | 40.58 (17)  |
| C8   | Fe1  | C9   | 40.33 (16)  | C52  | Fe2  | C45  | 142.24 (15) |
| C9   | Fe1  | C2   | 111.30 (14) | C52  | Fe2  | C46  | 177.48 (14) |
| C9   | Fe1  | C3   | 118.27 (15) | C52  | Fe2  | C48  | 41.29 (13)  |
| C10  | Fe1  | C2   | 118.28 (15) | C52  | Fe2  | C50  | 68.53 (16)  |
| C10  | Fe1  | C3   | 150.53 (15) | C52  | Fe2  | C51  | 40.52 (15)  |
| C10  | Fe1  | C4   | 168.80 (15) | C77  | S3   | Cu02 | 82.34 (12)  |
| C10  | Fe1  | C6   | 41.03 (13)  | C77  | S4   | Cu02 | 83.95 (12)  |
| C10  | Fe1  | C8   | 68.55 (16)  | C43  | P3   | Cu02 | 115.46 (10) |
| C10  | Fe1  | C9   | 40.73 (15)  | C43  | P3   | C53  | 103.20 (15) |
| C35  | S1   | Cu1  | 82.78 (11)  | C43  | P3   | C59  | 102.72 (15) |
| C35  | S2   | Cu1  | 82.23 (11)  | C53  | P3   | Cu02 | 112.03 (11) |
| C1   | P1   | Cu1  | 112.74 (10) | C59  | P3   | Cu02 | 117.54 (11) |
| C1   | P1   | C23  | 106.68 (15) | C59  | P3   | C53  | 104.25 (15) |
| C1   | P1   | C29  | 102.56 (15) | C48  | P4   | Cu02 | 116.08 (10) |
| C23  | P1   | Cu1  | 115.90 (11) | C48  | P4   | C65  | 102.17 (16) |
| C23  | P1   | C29  | 103.78 (15) | C48  | P4   | C71  | 101.37 (15) |
| C29  | P1   | Cu1  | 113.90 (11) | C65  | P4   | Cu02 | 118.13 (12) |
| C6   | P2   | Cu1  | 112.90 (10) | C65  | P4   | C71  | 101.91 (14) |
| C6   | P2   | C11  | 104.81 (14) | C71  | P4   | Cu02 | 114.75 (11) |
| C6   | P2   | C17  | 101.85 (15) | C77  | N2   | C78  | 125.2 (3)   |
| C11  | P2   | Cu1  | 116.41 (11) | P3   | C43  | Fe2  | 121.87 (15) |
| C17  | P2   | Cu1  | 117.93 (10) | C44  | C43  | Fe2  | 69.65 (17)  |
| C17  | P2   | C11  | 100.96 (14) | C44  | C43  | P3   | 129.9 (3)   |
| C35  | N1   | C36  | 123.7 (3)   | C47  | C43  | Fe2  | 69.29 (17)  |
| P1   | C1   | Fe1  | 120.34 (16) | C47  | C43  | P3   | 122.5 (2)   |
| C2   | C1   | Fe1  | 70.73 (17)  | C47  | C43  | C44  | 107.4 (3)   |
| C2   | C1   | P1   | 134.5 (3)   | C43  | C44  | Fe2  | 69.21 (17)  |
| C2   | C1   | C5   | 106.7 (3)   | C45  | C44  | Fe2  | 70.47 (19)  |
| C5   | C1   | Fe1  | 69.03 (17)  | C45  | C44  | C43  | 108.5 (3)   |
| C5   | C1   | P1   | 118.6 (2)   | C44  | C45  | Fe2  | 69.17 (18)  |
| C1   | C2   | Fe1  | 68.40 (17)  | C44  | C45  | C46  | 108.3 (3)   |
| C3   | C2   | Fe1  | 69.70 (19)  | C46  | C45  | Fe2  | 69.88 (19)  |
| C3   | C2   | C1   | 108.2 (3)   | C45  | C46  | Fe2  | 69.9 (2)    |
| C2   | C3   | Fe1  | 70.09 (19)  | C45  | C46  | C47  | 108.1 (3)   |

**Table 5 Bond Angles.**

| Atom | Atom | Atom | Angle/°     | Atom | Atom | Atom | Angle/°     |
|------|------|------|-------------|------|------|------|-------------|
| C4   | C3   | Fe1  | 69.7 (2)    | C47  | C46  | Fe2  | 68.48 (19)  |
| C4   | C3   | C2   | 108.9 (3)   | C43  | C47  | Fe2  | 69.52 (18)  |
| C3   | C4   | Fe1  | 70.3 (2)    | C43  | C47  | C46  | 107.7 (3)   |
| C3   | C4   | C5   | 108.1 (3)   | C46  | C47  | Fe2  | 70.40 (19)  |
| C5   | C4   | Fe1  | 68.72 (19)  | P4   | C48  | Fe2  | 124.61 (15) |
| C1   | C5   | Fe1  | 69.35 (18)  | C49  | C48  | Fe2  | 69.05 (18)  |
| C4   | C5   | Fe1  | 70.47 (19)  | C49  | C48  | P4   | 128.8 (3)   |
| C4   | C5   | C1   | 108.1 (3)   | C49  | C48  | C52  | 106.5 (3)   |
| P2   | C6   | Fe1  | 121.57 (15) | C52  | C48  | Fe2  | 69.14 (18)  |
| C7   | C6   | Fe1  | 68.82 (18)  | C52  | C48  | P4   | 124.6 (3)   |
| C7   | C6   | P2   | 130.2 (3)   | C48  | C49  | Fe2  | 69.84 (18)  |
| C10  | C6   | Fe1  | 69.46 (18)  | C50  | C49  | Fe2  | 70.02 (19)  |
| C10  | C6   | P2   | 122.3 (3)   | C50  | C49  | C48  | 108.8 (3)   |
| C10  | C6   | C7   | 107.1 (3)   | C49  | C50  | Fe2  | 69.19 (18)  |
| C6   | C7   | Fe1  | 69.98 (17)  | C49  | C50  | C51  | 108.0 (3)   |
| C8   | C7   | Fe1  | 70.50 (19)  | C51  | C50  | Fe2  | 70.23 (19)  |
| C8   | C7   | C6   | 108.5 (3)   | C50  | C51  | Fe2  | 69.2 (2)    |
| C7   | C8   | Fe1  | 68.84 (18)  | C52  | C51  | Fe2  | 68.99 (19)  |
| C9   | C8   | Fe1  | 69.88 (19)  | C52  | C51  | C50  | 108.0 (3)   |
| C9   | C8   | C7   | 107.9 (3)   | C48  | C52  | Fe2  | 69.57 (19)  |
| C8   | C9   | Fe1  | 69.8 (2)    | C51  | C52  | Fe2  | 70.5 (2)    |
| C8   | C9   | C10  | 108.6 (3)   | C51  | C52  | C48  | 108.7 (3)   |
| C10  | C9   | Fe1  | 69.34 (19)  | C54  | C53  | P3   | 118.1 (3)   |
| C6   | C10  | Fe1  | 69.51 (18)  | C54  | C53  | C58  | 119.1 (3)   |
| C9   | C10  | Fe1  | 69.9 (2)    | C58  | C53  | P3   | 122.8 (3)   |
| C9   | C10  | C6   | 107.8 (3)   | C53  | C54  | C55  | 120.5 (3)   |
| C12  | C11  | P2   | 116.7 (2)   | C56  | C55  | C54  | 119.4 (4)   |
| C16  | C11  | P2   | 123.9 (3)   | C57  | C56  | C55  | 120.4 (4)   |
| C16  | C11  | C12  | 119.3 (3)   | C56  | C57  | C58  | 120.5 (4)   |
| C13  | C12  | C11  | 120.3 (3)   | C57  | C58  | C53  | 120.0 (3)   |
| C14  | C13  | C12  | 120.3 (4)   | C60  | C59  | P3   | 116.4 (3)   |
| C13  | C14  | C15  | 120.1 (3)   | C64  | C59  | P3   | 124.0 (3)   |
| C14  | C15  | C16  | 120.1 (3)   | C64  | C59  | C60  | 119.5 (3)   |
| C11  | C16  | C15  | 119.8 (3)   | C61  | C60  | C59  | 119.9 (4)   |
| C18  | C17  | P2   | 119.9 (2)   | C62  | C61  | C60  | 120.8 (4)   |
| C22  | C17  | P2   | 121.2 (2)   | C63  | C62  | C61  | 119.6 (3)   |
| C22  | C17  | C18  | 119.0 (3)   | C62  | C63  | C64  | 120.3 (4)   |
| C19  | C18  | C17  | 120.7 (3)   | C59  | C64  | C63  | 119.9 (4)   |
| C18  | C19  | C20  | 119.8 (3)   | C66  | C65  | P4   | 117.0 (3)   |
| C21  | C20  | C19  | 119.6 (3)   | C66  | C65  | C70  | 119.4 (3)   |
| C20  | C21  | C22  | 120.7 (3)   | C70  | C65  | P4   | 123.5 (3)   |
| C21  | C22  | C17  | 120.1 (3)   | C65  | C66  | C67  | 120.0 (4)   |
| C24  | C23  | P1   | 116.8 (3)   | C68  | C67  | C66  | 119.8 (4)   |



**Table 5 Bond Angles.**

| Atom | Atom | Atom | Angle/°     | Atom | Atom | Atom | Angle/°     |
|------|------|------|-------------|------|------|------|-------------|
| C24  | C23  | C28  | 118.7 (3)   | C67  | C68  | C69  | 121.1 (4)   |
| C28  | C23  | P1   | 124.4 (3)   | C68  | C69  | C70  | 119.6 (4)   |
| C23  | C24  | C25  | 120.6 (4)   | C65  | C70  | C69  | 120.1 (4)   |
| C26  | C25  | C24  | 119.4 (4)   | C72  | C71  | P4   | 119.3 (2)   |
| C27  | C26  | C25  | 120.6 (4)   | C76  | C71  | P4   | 121.4 (2)   |
| C26  | C27  | C28  | 120.2 (4)   | C76  | C71  | C72  | 119.3 (3)   |
| C23  | C28  | C27  | 120.4 (3)   | C73  | C72  | C71  | 120.3 (3)   |
| C30  | C29  | P1   | 122.4 (3)   | C74  | C73  | C72  | 120.1 (3)   |
| C30  | C29  | C34  | 119.4 (3)   | C73  | C74  | C75  | 120.2 (3)   |
| C34  | C29  | P1   | 118.1 (3)   | C76  | C75  | C74  | 119.8 (3)   |
| C29  | C30  | C31  | 120.5 (3)   | C75  | C76  | C71  | 120.3 (3)   |
| C32  | C31  | C30  | 120.2 (4)   | S3   | C77  | S4   | 118.23 (19) |
| C31  | C32  | C33  | 119.7 (3)   | N2   | C77  | S3   | 119.8 (3)   |
| C32  | C33  | C34  | 120.2 (4)   | N2   | C77  | S4   | 121.9 (3)   |
| C29  | C34  | C33  | 120.0 (3)   | N2   | C78  | C79  | 113.2 (3)   |
| S1   | C35  | S2   | 118.81 (19) | C80  | C79  | C78  | 109.7 (8)   |
| N1   | C35  | S1   | 121.5 (2)   | C84  | C79  | C78  | 128.4 (10)  |
| N1   | C35  | S2   | 119.7 (3)   | C84  | C79  | C80  | 121.6 (10)  |
| N1   | C36  | C37  | 109.3 (3)   | C85  | C79  | C78  | 129.2 (9)   |
| C38  | C37  | C36  | 120.2 (3)   | C85  | C79  | C89  | 113.3 (12)  |
| C38  | C37  | C42  | 118.8 (3)   | C89  | C79  | C78  | 116.6 (10)  |
| C42  | C37  | C36  | 121.0 (3)   | C81  | C80  | C79  | 116.7 (9)   |
| C39  | C38  | C37  | 120.7 (3)   | C82  | C81  | C80  | 116.8 (11)  |
| C38  | C39  | C40  | 119.9 (4)   | C83  | C82  | C81  | 123.4 (12)  |
| C39  | C40  | C41  | 119.1 (4)   | C82  | C83  | C84  | 120.8 (14)  |
| C42  | C41  | C40  | 120.7 (4)   | C79  | C84  | C83  | 120.3 (16)  |
| C41  | C42  | C37  | 120.8 (4)   | C79  | C85  | C86  | 126.4 (13)  |
| S4   | Cu02 | S3   | 75.11 (3)   | C85  | C86  | C87  | 117.5 (17)  |
| P3   | Cu02 | S3   | 108.46 (3)  | C88  | C87  | C86  | 119.6 (17)  |
| P3   | Cu02 | S4   | 118.22 (4)  | C87  | C88  | C89  | 122.4 (16)  |
| P4   | Cu02 | S3   | 123.43 (3)  | C88  | C89  | C79  | 120.5 (17)  |

## Molecular structure of BzNHC(S)NHBz

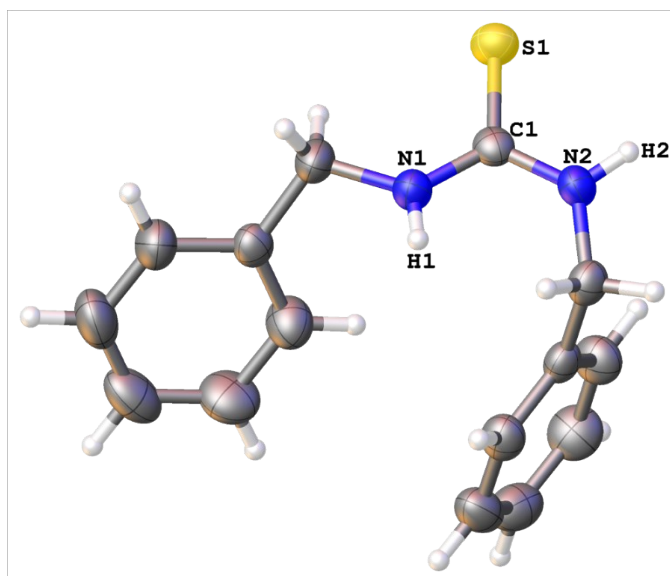

### Bond Lengths for (BzNH)<sub>2</sub>C=S

| Atom | Atom | Length/Å   | Atom | Atom | Length/Å |
|------|------|------------|------|------|----------|
| S1   | C1   | 1.6983(19) | C6   | C7   | 1.371(4) |
| N1   | C1   | 1.335(2)   | C7   | C8   | 1.385(3) |
| N1   | C2   | 1.455(2)   | C9   | C10  | 1.507(3) |
| N2   | C1   | 1.334(2)   | C10  | C11  | 1.377(3) |
| N2   | C9   | 1.459(2)   | C10  | C15  | 1.381(3) |
| C2   | C3   | 1.504(3)   | C11  | C12  | 1.383(3) |
| C3   | C4   | 1.378(3)   | C12  | C13  | 1.369(3) |
| C3   | C8   | 1.373(3)   | C13  | C14  | 1.374(3) |
| C4   | C5   | 1.377(3)   | C14  | C15  | 1.379(3) |
| C5   | C6   | 1.360(4)   |      |      |          |

### Bond Angles for (BzNH)<sub>2</sub>C=S

| Atom | Atom | Atom | Angle/°    | Atom | Atom | Atom | Angle/°    |
|------|------|------|------------|------|------|------|------------|
| C1   | N1   | C2   | 125.58(16) | C6   | C7   | C8   | 120.7(2)   |
| C1   | N2   | C9   | 125.46(16) | C3   | C8   | C7   | 120.5(2)   |
| N1   | C1   | S1   | 123.04(14) | N2   | C9   | C10  | 113.06(16) |
| N2   | C1   | S1   | 119.91(14) | C11  | C10  | C9   | 120.99(17) |
| N2   | C1   | N1   | 117.05(16) | C11  | C10  | C15  | 118.39(18) |
| N1   | C2   | C3   | 112.63(16) | C15  | C10  | C9   | 120.62(17) |
| C4   | C3   | C2   | 119.33(18) | C10  | C11  | C12  | 121.45(19) |
| C8   | C3   | C2   | 122.49(18) | C13  | C12  | C11  | 119.3(2)   |
| C8   | C3   | C4   | 118.16(19) | C12  | C13  | C14  | 120.2(2)   |
| C5   | C4   | C3   | 121.1(2)   | C13  | C14  | C15  | 120.2(2)   |
| C6   | C5   | C4   | 120.6(2)   | C14  | C15  | C10  | 120.5(2)   |
| C5   | C6   | C7   | 119.0(2)   |      |      |      |            |

Figure S1  $^1\text{H}$  NMR spectrum of **1**

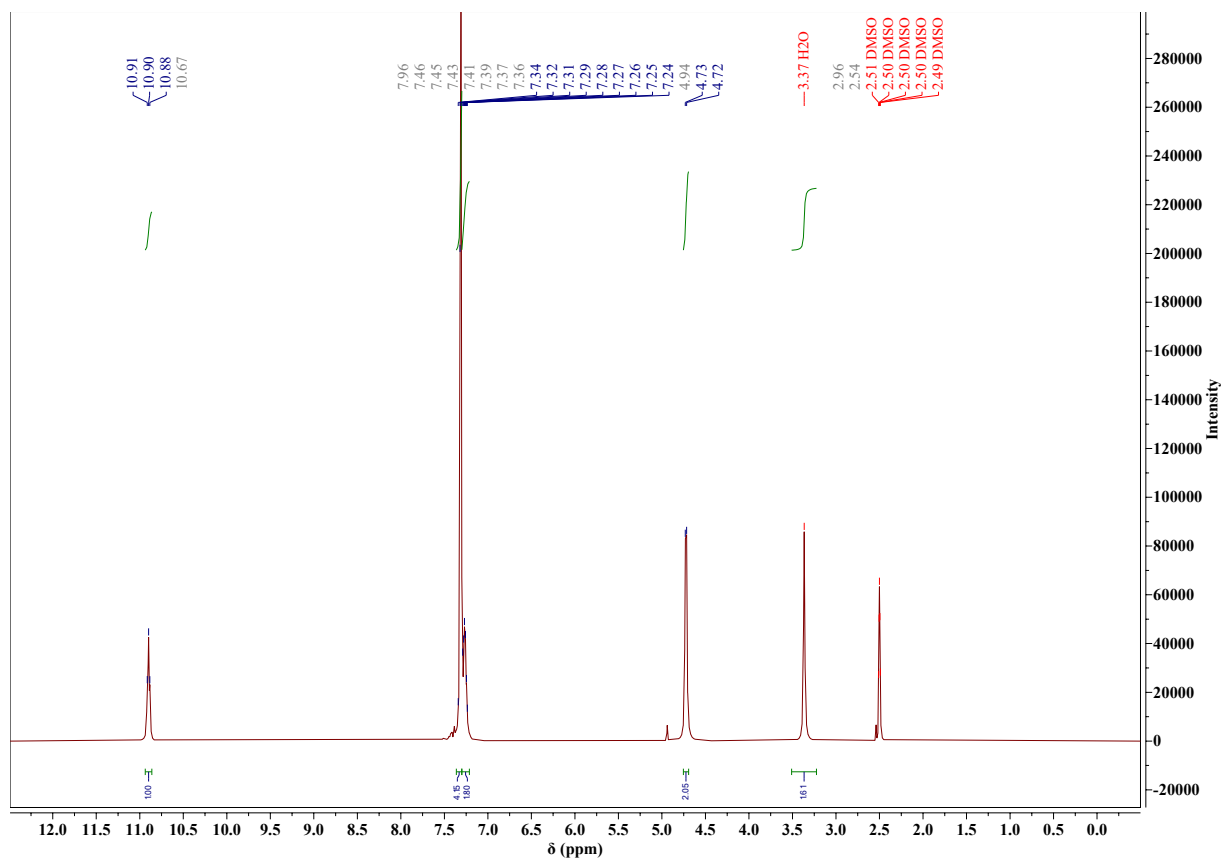

Figure S2  $^{13}\text{C}\{^1\text{H}\}$  NMR spectrum of **1**

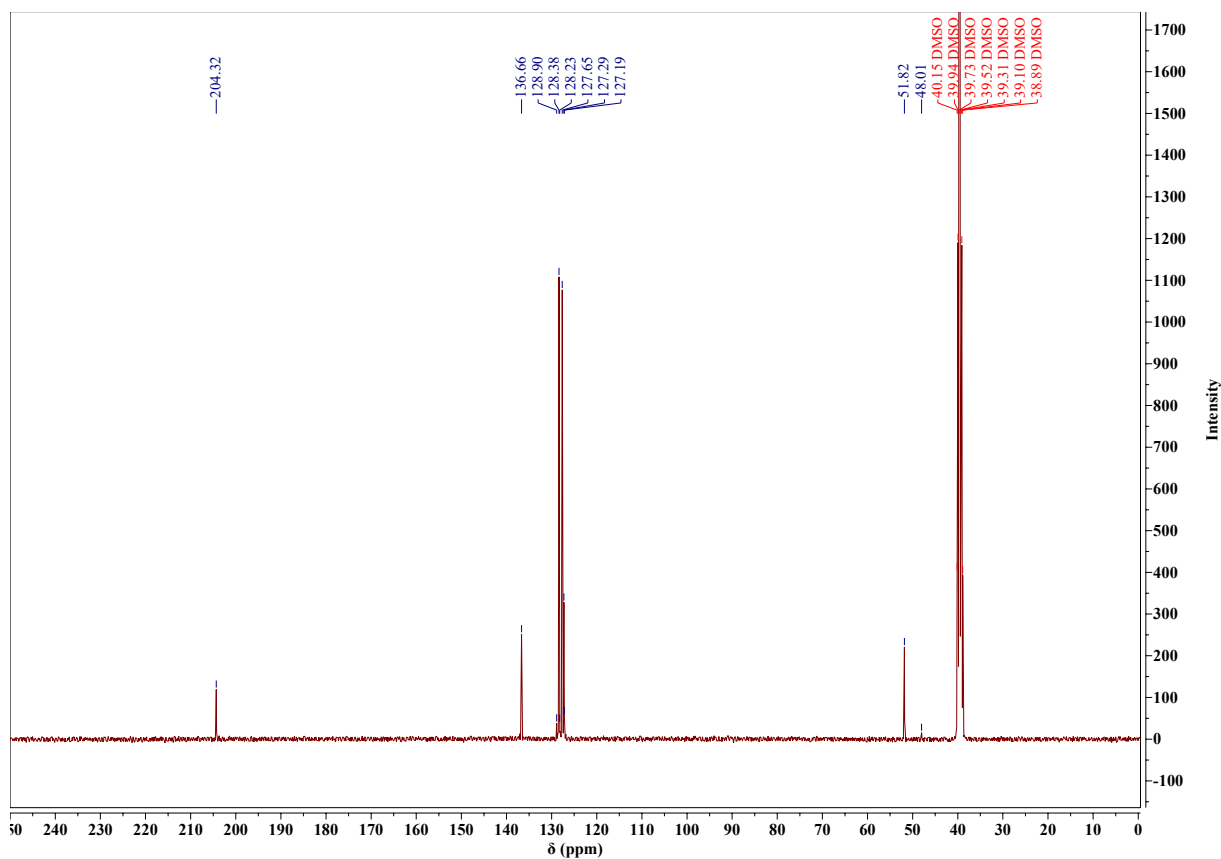

Figure S3  $^1\text{H}$  NMR spectrum of  $(\text{BzNH})_2\text{C}=\text{S}$

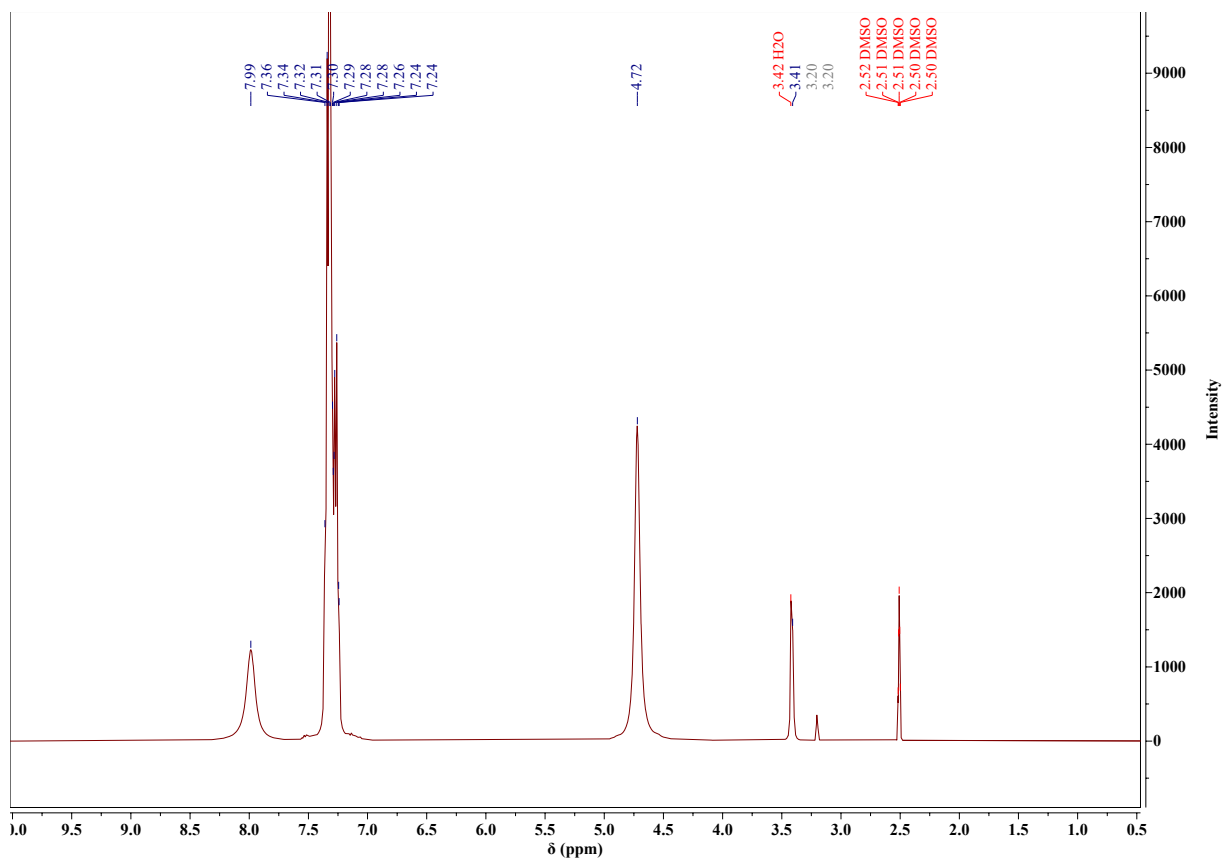

Figure S4  $^{13}\text{C}\{^1\text{H}\}$  NMR spectrum of  $(\text{BzNH})_2\text{C}=\text{S}$

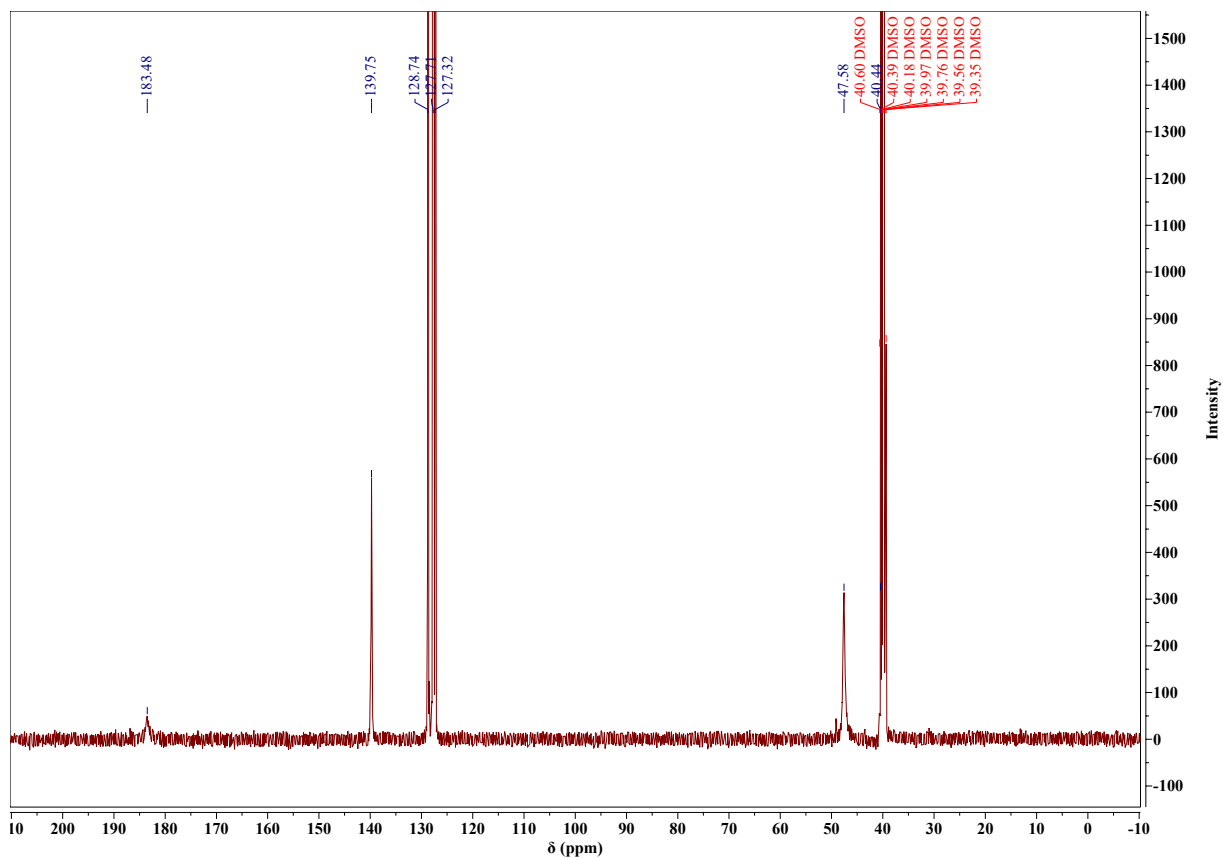

Figure S5  $^1\text{H}$  NMR spectrum of **2**

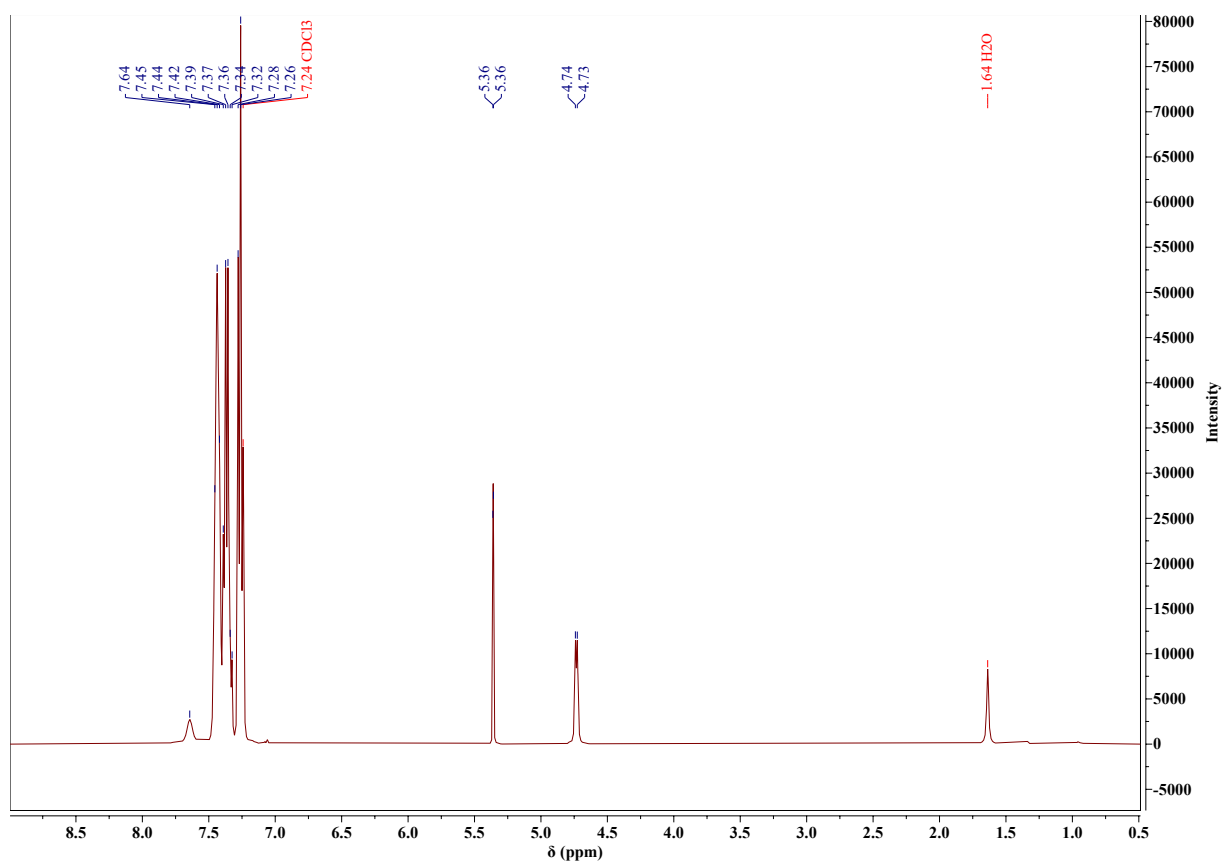

Figure S6  $^{13}\text{C}\{^1\text{H}\}$  NMR spectrum of **2**

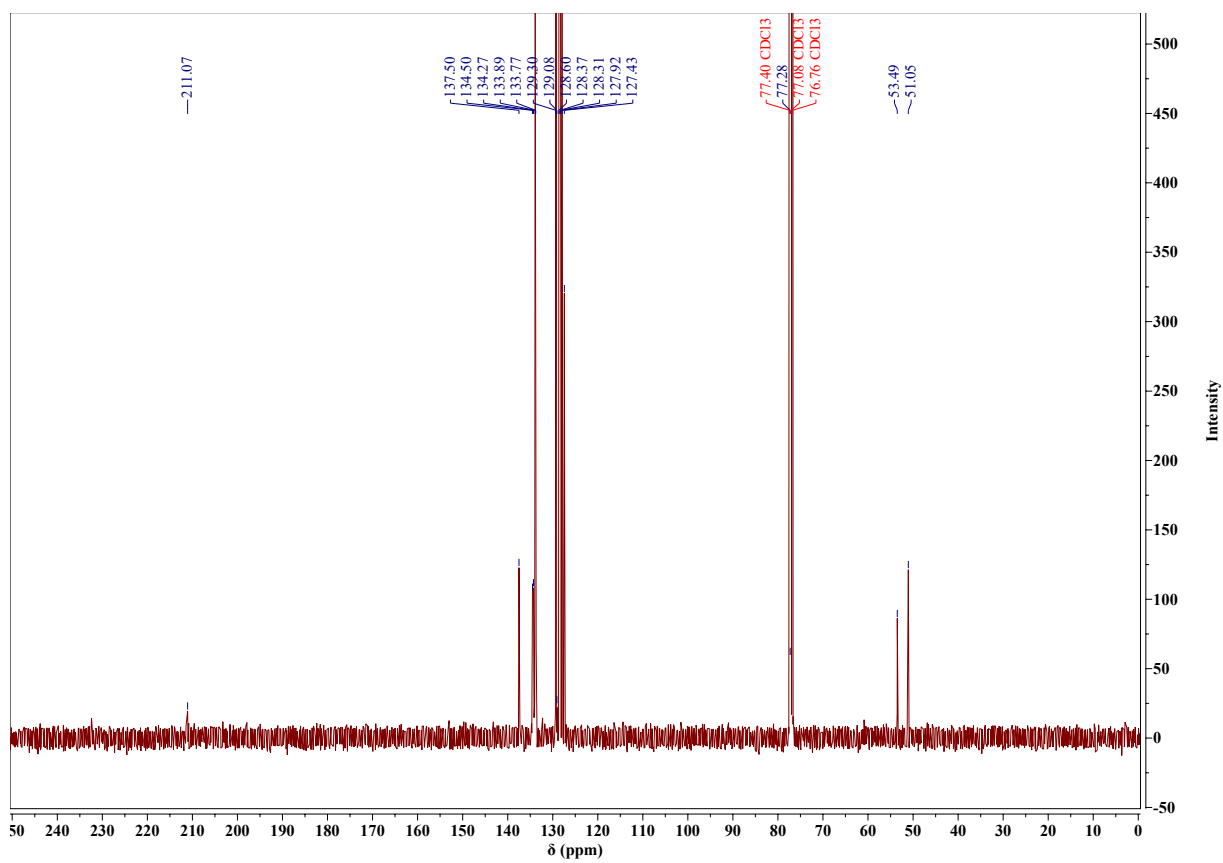

Figure S7  $^{31}\text{P}\{^1\text{H}\}$  NMR spectrum of **2**

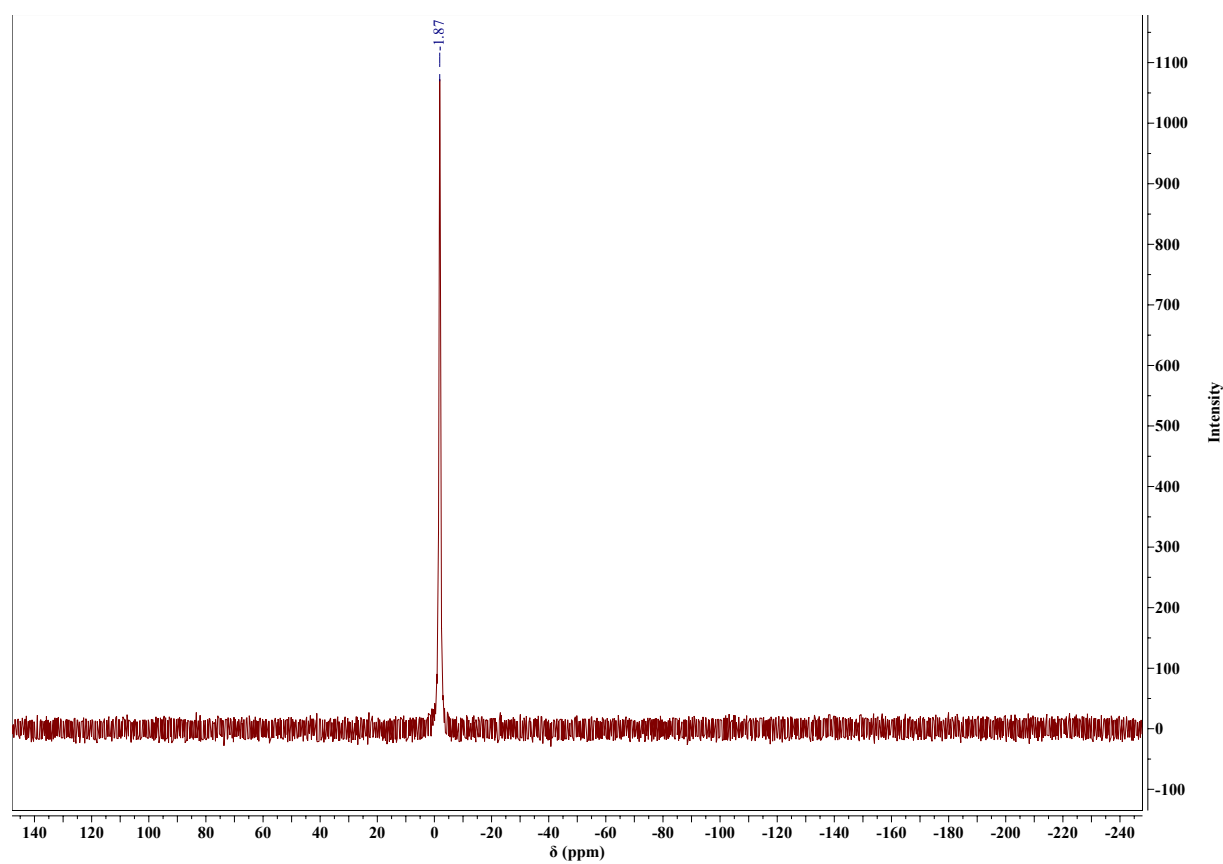

Figure S8  $^1\text{H}$  NMR spectrum of **3**

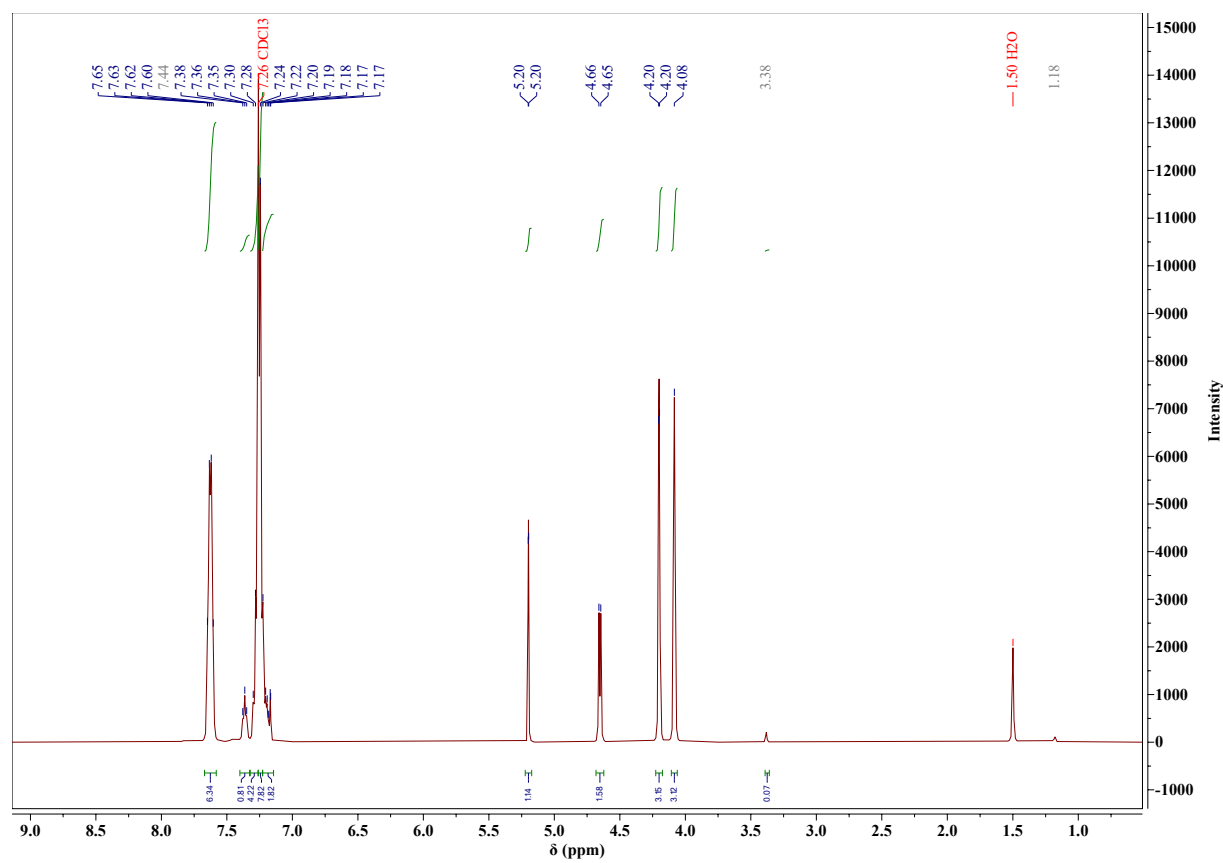

**Figure S9**  $^{13}\text{C}\{^1\text{H}\}$  NMR spectrum of **3**

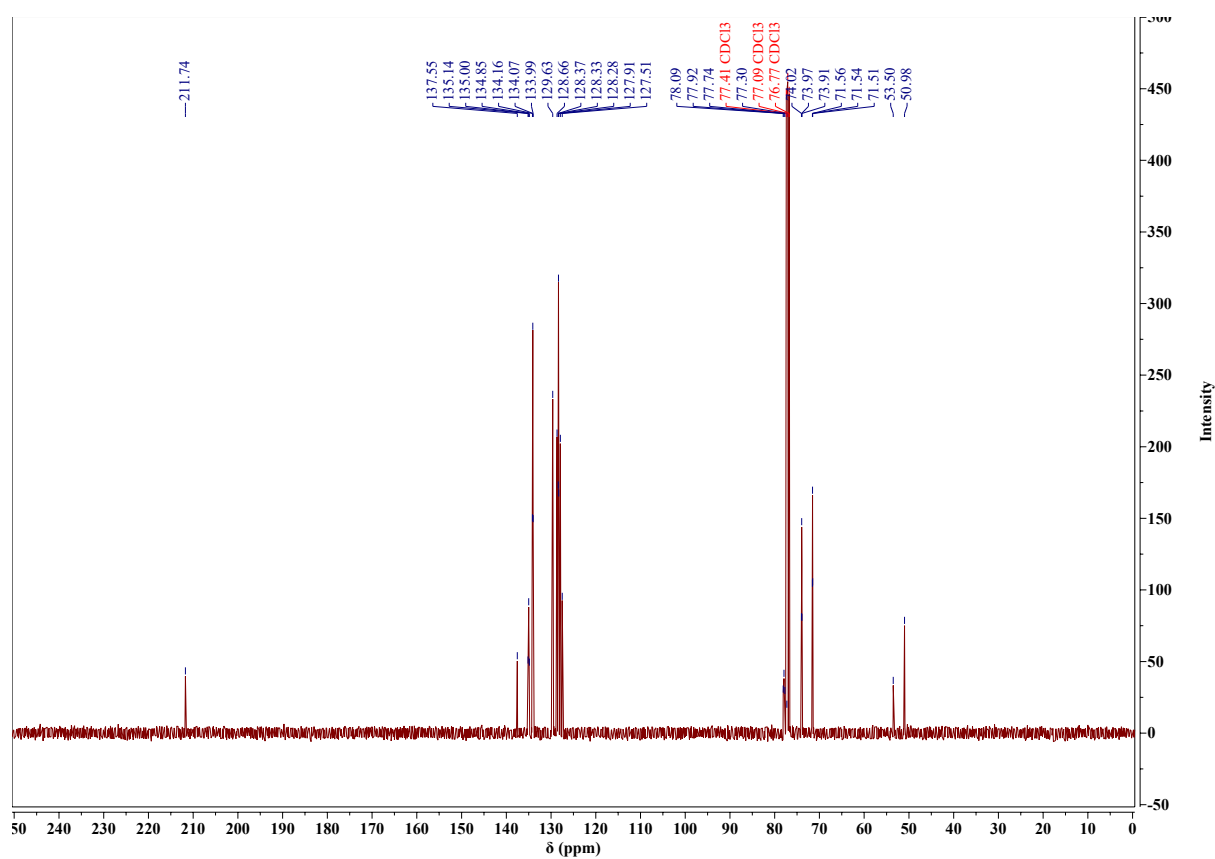

**Figure S10**  $^{31}\text{P}\{^1\text{H}\}$  NMR spectrum of **3**

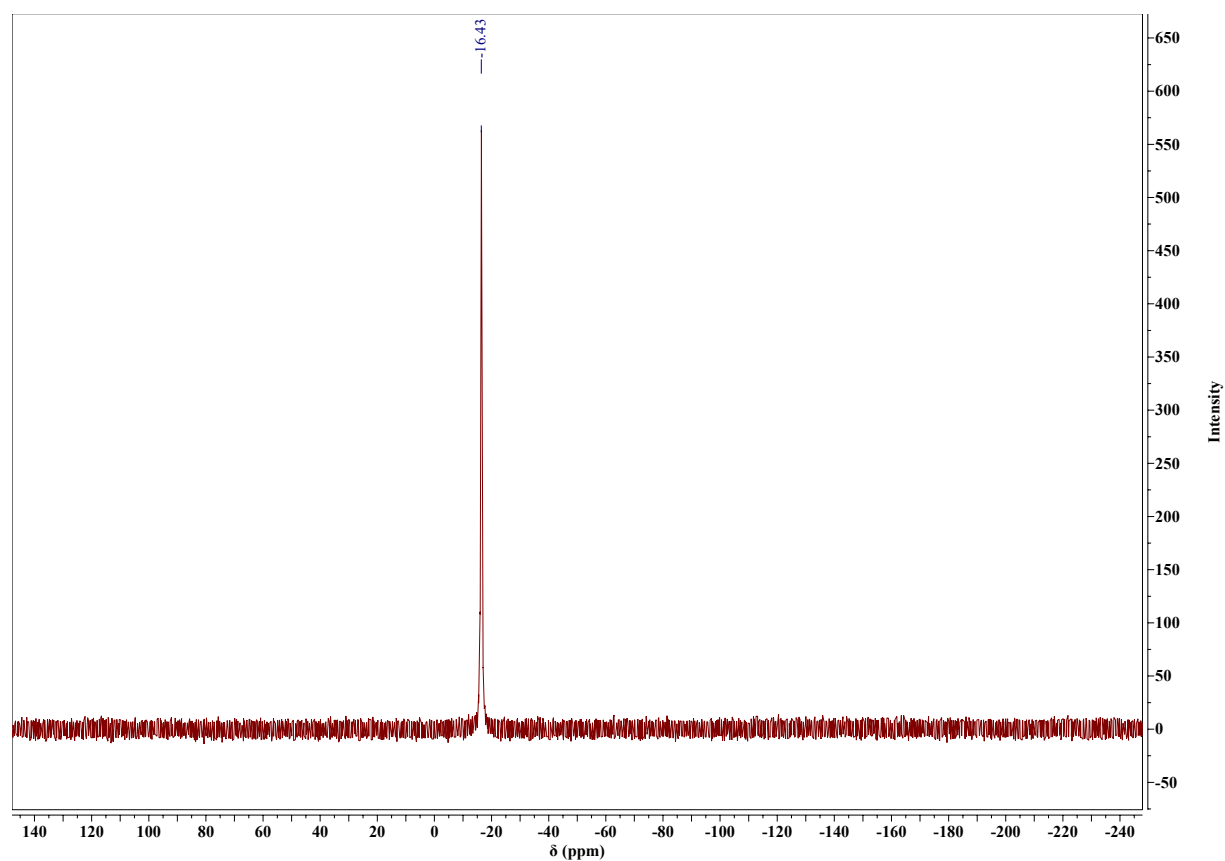

Figure S11 IR spectrum of 1

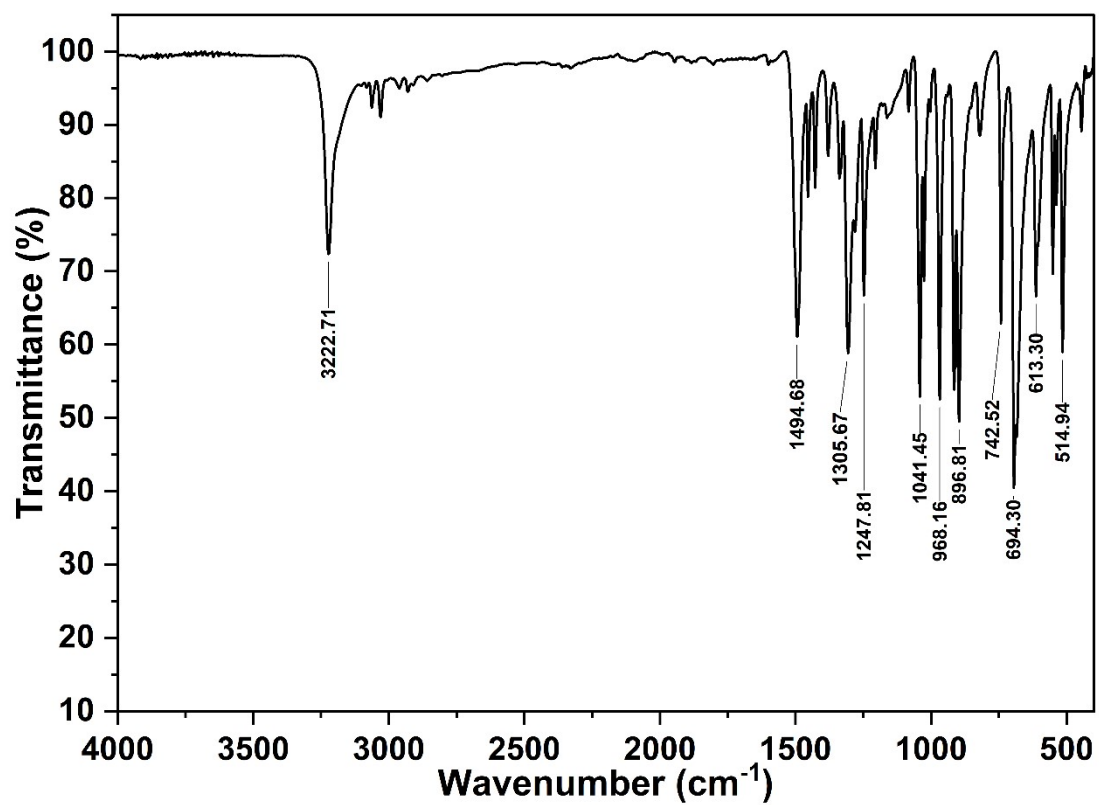

Supplement: d4dt02366h1.pdf [file d4dt02366h1.pdf]
